# Supplementary material for: N-Substituted pyridazines as building blocks in novel supramolecular architectures
Source: Royal Society of Chemistry journal article supplement (doi:10.1039/b902765c), 2009-01-01

## **N-Substituted pyridazines as building blocks in novel supramolecular architectures**

Sunil Varughese, Gareth Cooke and Sylvia M. Draper\*

### **Supplementary Information**

| <b>INDEX</b>                         |     |
|--------------------------------------|-----|
| Crystallographic information of 1    | S1  |
| Crystallographic information of 2    | S8  |
| Crystallographic information of 3    | S15 |
| Hydrogen bond table                  | S27 |
| Torsion angles                       | S28 |
| Synthesis and spectral analysis      | S29 |
| Additional figures of 1              | S32 |
| Additional figures of 2              | S33 |
| Additional figures of 3              | S34 |
| Thermogravimetric plot of 1          | S35 |
| Thermogravimetric plot of 2          | S36 |
| Thermogravimetric plot of 3          | S37 |
| Normalized absorbance spectra of 1-3 | S38 |

Crystallographic information for **1**

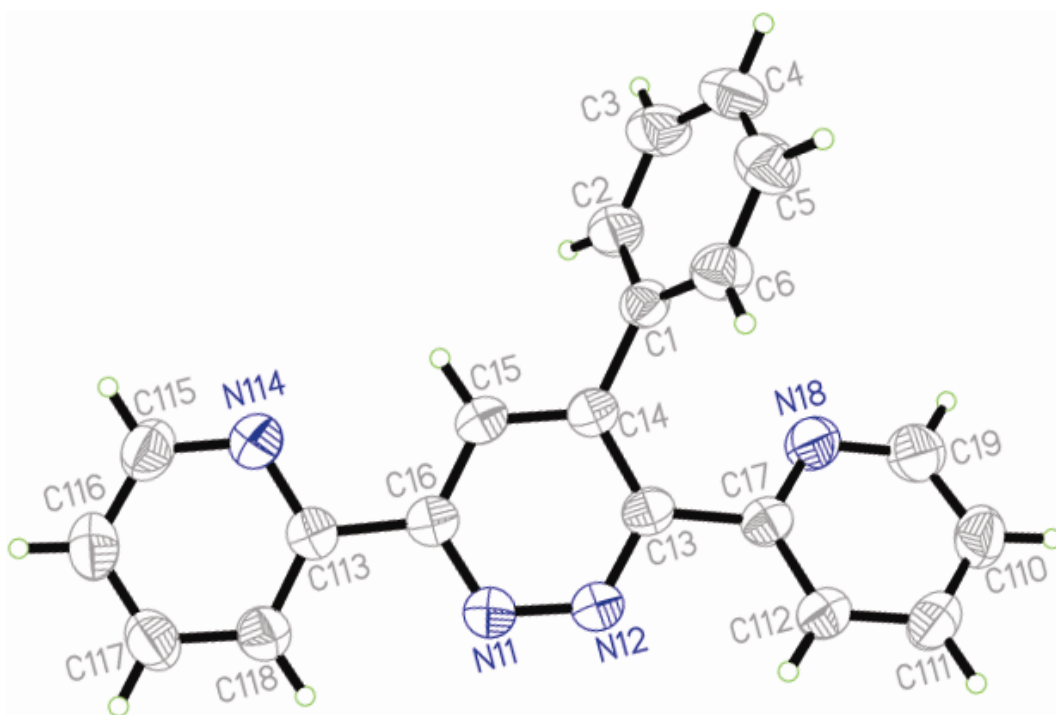

### Crystal data and structure refinement for **1**.

|                                   |                                                |                 |
|-----------------------------------|------------------------------------------------|-----------------|
| Identification code               | 1                                              |                 |
| Empirical formula                 | C <sub>20</sub> H <sub>14</sub> N <sub>4</sub> |                 |
| Formula weight                    | 310.35                                         |                 |
| Temperature                       | 123(2) K                                       |                 |
| Wavelength                        | 0.71073 Å                                      |                 |
| Crystal system                    | Monoclinic                                     |                 |
| Space group                       | P2(1)/n                                        |                 |
| Unit cell dimensions              | a = 6.164(6) Å                                 | α = 90°.        |
|                                   | b = 14.713(1) Å                                | β = 95.380(1)°. |
|                                   | c = 17.365(1) Å                                | γ = 90°.        |
| Volume                            | 1567.9(15) Å <sup>3</sup>                      |                 |
| Z                                 | 4                                              |                 |
| Density (calculated)              | 1.315 Mg/m <sup>3</sup>                        |                 |
| Absorption coefficient            | 0.081 mm <sup>-1</sup>                         |                 |
| F(000)                            | 648                                            |                 |
| Crystal size                      | 0.22 x 0.16 x 0.12 mm <sup>3</sup>             |                 |
| Theta range for data collection   | 1.82 to 24.96°.                                |                 |
| Index ranges                      | -7 ≤ h ≤ 7, -17 ≤ k ≤ 17, -20 ≤ l ≤ 20         |                 |
| Reflections collected             | 16199                                          |                 |
| Independent reflections           | 2735 [R(int) = 0.0365]                         |                 |
| Completeness to theta = 24.96°    | 99.6 %                                         |                 |
| Absorption correction             | Multi scan                                     |                 |
| Max. and min. transmission        | 0.9904 and 0.9824                              |                 |
| Refinement method                 | Full-matrix least-squares on F <sup>2</sup>    |                 |
| Data / restraints / parameters    | 2735 / 0 / 217                                 |                 |
| Goodness-of-fit on F <sup>2</sup> | 1.031                                          |                 |
| Final R indices [I > 2σ(I)]       | R1 = 0.0404, wR2 = 0.0974                      |                 |
| R indices (all data)              | R1 = 0.0539, wR2 = 0.1043                      |                 |
| Largest diff. peak and hole       | 0.151 and -0.155 e.Å <sup>-3</sup>             |                 |

Table 2. Atomic coordinates ( $\times 10^4$ ) and equivalent isotropic displacement parameters ( $\text{\AA}^2 \times 10^3$ ) for 1.  $U(\text{eq})$  is defined as one third of the trace of the orthogonalized  $U^{ij}$  tensor.

|        | x        | y       | z        | $U(\text{eq})$ |
|--------|----------|---------|----------|----------------|
| C(1)   | 741(2)   | 8427(1) | 350(1)   | 39(1)          |
| C(2)   | -940(3)  | 8387(1) | -240(1)  | 49(1)          |
| C(3)   | -636(3)  | 8703(1) | -973(1)  | 58(1)          |
| C(4)   | 1332(3)  | 9077(1) | -1122(1) | 59(1)          |
| C(5)   | 3002(3)  | 9132(1) | -539(1)  | 58(1)          |
| C(6)   | 2712(3)  | 8808(1) | 193(1)   | 51(1)          |
| C(13)  | 1611(2)  | 7457(1) | 1578(1)  | 39(1)          |
| C(14)  | 360(2)   | 8120(1) | 1145(1)  | 37(1)          |
| C(15)  | -1289(2) | 8512(1) | 1515(1)  | 40(1)          |
| C(16)  | -1584(2) | 8275(1) | 2275(1)  | 39(1)          |
| C(17)  | 3387(2)  | 6905(1) | 1278(1)  | 40(1)          |
| C(19)  | 4816(3)  | 6220(1) | 260(1)   | 65(1)          |
| C(110) | 6612(3)  | 5914(1) | 714(1)   | 60(1)          |
| C(111) | 6758(3)  | 6102(1) | 1492(1)  | 52(1)          |
| C(112) | 5127(2)  | 6605(1) | 1781(1)  | 44(1)          |
| C(113) | -3367(2) | 8676(1) | 2695(1)  | 40(1)          |
| C(115) | -6316(3) | 9624(1) | 2646(1)  | 58(1)          |
| C(116) | -6703(3) | 9429(1) | 3397(1)  | 58(1)          |
| C(117) | -5349(3) | 8821(1) | 3804(1)  | 60(1)          |
| C(118) | -3656(3) | 8438(1) | 3449(1)  | 50(1)          |
| N(11)  | -290(2)  | 7671(1) | 2671(1)  | 47(1)          |
| N(12)  | 1283(2)  | 7258(1) | 2315(1)  | 46(1)          |
| N(18)  | 3198(2)  | 6706(1) | 521(1)   | 54(1)          |
| N(114) | -4685(2) | 9265(1) | 2287(1)  | 52(1)          |

Table 3. Bond lengths [Å] and angles [°] for 1.

---

|                 |            |
|-----------------|------------|
| C(1)-C(6)       | 1.388(2)   |
| C(1)-C(2)       | 1.389(2)   |
| C(1)-C(14)      | 1.492(2)   |
| C(2)-C(3)       | 1.384(2)   |
| C(3)-C(4)       | 1.378(3)   |
| C(4)-C(5)       | 1.377(3)   |
| C(5)-C(6)       | 1.384(2)   |
| C(13)-N(12)     | 1.3461(18) |
| C(13)-C(14)     | 1.415(2)   |
| C(13)-C(17)     | 1.497(2)   |
| C(14)-C(15)     | 1.380(2)   |
| C(15)-C(16)     | 1.392(2)   |
| C(16)-N(11)     | 1.3410(19) |
| C(16)-C(113)    | 1.496(2)   |
| C(17)-N(18)     | 1.3412(19) |
| C(17)-C(112)    | 1.389(2)   |
| C(19)-N(18)     | 1.340(2)   |
| C(19)-C(110)    | 1.373(3)   |
| C(110)-C(111)   | 1.374(3)   |
| C(111)-C(112)   | 1.380(2)   |
| C(113)-N(114)   | 1.343(2)   |
| C(113)-C(118)   | 1.383(2)   |
| C(115)-N(114)   | 1.340(2)   |
| C(115)-C(116)   | 1.378(2)   |
| C(116)-C(117)   | 1.373(3)   |
| C(117)-C(118)   | 1.381(2)   |
| N(11)-N(12)     | 1.3433(19) |
|                 |            |
| C(6)-C(1)-C(2)  | 118.57(15) |
| C(6)-C(1)-C(14) | 121.43(13) |
| C(2)-C(1)-C(14) | 119.89(14) |
| C(3)-C(2)-C(1)  | 120.54(16) |
| C(4)-C(3)-C(2)  | 120.23(17) |
| C(5)-C(4)-C(3)  | 119.79(16) |

|                      |            |
|----------------------|------------|
| C(4)-C(5)-C(6)       | 120.14(17) |
| C(5)-C(6)-C(1)       | 120.71(16) |
| N(12)-C(13)-C(14)    | 122.24(14) |
| N(12)-C(13)-C(17)    | 113.11(13) |
| C(14)-C(13)-C(17)    | 124.65(13) |
| C(15)-C(14)-C(13)    | 115.38(13) |
| C(15)-C(14)-C(1)     | 119.40(13) |
| C(13)-C(14)-C(1)     | 125.20(13) |
| C(14)-C(15)-C(16)    | 120.28(14) |
| N(11)-C(16)-C(15)    | 121.87(14) |
| N(11)-C(16)-C(113)   | 116.08(13) |
| C(15)-C(16)-C(113)   | 122.05(14) |
| N(18)-C(17)-C(112)   | 122.53(14) |
| N(18)-C(17)-C(13)    | 117.44(13) |
| C(112)-C(17)-C(13)   | 120.03(14) |
| N(18)-C(19)-C(110)   | 124.49(17) |
| C(19)-C(110)-C(111)  | 118.24(17) |
| C(110)-C(111)-C(112) | 118.87(16) |
| C(111)-C(112)-C(17)  | 119.17(16) |
| N(114)-C(113)-C(118) | 122.48(15) |
| N(114)-C(113)-C(16)  | 115.65(13) |
| C(118)-C(113)-C(16)  | 121.85(14) |
| N(114)-C(115)-C(116) | 124.16(17) |
| C(117)-C(116)-C(115) | 118.17(16) |
| C(116)-C(117)-C(118) | 119.01(17) |
| C(117)-C(118)-C(113) | 119.26(16) |
| C(16)-N(11)-N(12)    | 118.96(13) |
| N(11)-N(12)-C(13)    | 121.17(13) |
| C(19)-N(18)-C(17)    | 116.67(15) |
| C(115)-N(114)-C(113) | 116.91(15) |

---

Symmetry transformations used to generate equivalent atoms:

Table 4. Anisotropic displacement parameters ( $\text{\AA}^2 \times 10^3$ ) for 1. The anisotropic displacement factor exponent takes the form:  $-2\pi^2 [h^2 a^{*2}U^{11} + \dots + 2 h k a^* b^* U^{12}]$

|        | U <sup>11</sup> | U <sup>22</sup> | U <sup>33</sup> | U <sup>23</sup> | U <sup>13</sup> | U <sup>12</sup> |
|--------|-----------------|-----------------|-----------------|-----------------|-----------------|-----------------|
| C(1)   | 43(1)           | 36(1)           | 39(1)           | 0(1)            | 2(1)            | 5(1)            |
| C(2)   | 48(1)           | 55(1)           | 44(1)           | 1(1)            | -1(1)           | 1(1)            |
| C(3)   | 71(1)           | 64(1)           | 39(1)           | 2(1)            | -6(1)           | 2(1)            |
| C(4)   | 89(2)           | 49(1)           | 40(1)           | 4(1)            | 12(1)           | -2(1)           |
| C(5)   | 64(1)           | 55(1)           | 58(1)           | 5(1)            | 16(1)           | -10(1)          |
| C(6)   | 48(1)           | 56(1)           | 49(1)           | 4(1)            | -1(1)           | -5(1)           |
| C(13)  | 38(1)           | 39(1)           | 40(1)           | 0(1)            | -3(1)           | -3(1)           |
| C(14)  | 36(1)           | 37(1)           | 38(1)           | -1(1)           | -2(1)           | -3(1)           |
| C(15)  | 39(1)           | 38(1)           | 42(1)           | 3(1)            | -3(1)           | 1(1)            |
| C(16)  | 39(1)           | 37(1)           | 40(1)           | -1(1)           | 0(1)            | -4(1)           |
| C(17)  | 41(1)           | 34(1)           | 44(1)           | 2(1)            | 2(1)            | -2(1)           |
| C(19)  | 83(1)           | 65(1)           | 49(1)           | -6(1)           | 11(1)           | 22(1)           |
| C(110) | 58(1)           | 54(1)           | 72(1)           | 4(1)            | 20(1)           | 15(1)           |
| C(111) | 41(1)           | 47(1)           | 68(1)           | 9(1)            | 2(1)            | 5(1)            |
| C(112) | 42(1)           | 43(1)           | 47(1)           | 3(1)            | 0(1)            | -1(1)           |
| C(113) | 40(1)           | 38(1)           | 42(1)           | -4(1)           | 2(1)            | -5(1)           |
| C(115) | 47(1)           | 58(1)           | 69(1)           | 4(1)            | 8(1)            | 11(1)           |
| C(116) | 54(1)           | 54(1)           | 69(1)           | -7(1)           | 20(1)           | 4(1)            |
| C(117) | 72(1)           | 58(1)           | 52(1)           | -1(1)           | 21(1)           | 3(1)            |
| C(118) | 57(1)           | 48(1)           | 47(1)           | 0(1)            | 7(1)            | 4(1)            |
| N(11)  | 46(1)           | 53(1)           | 42(1)           | 2(1)            | 4(1)            | 6(1)            |
| N(12)  | 45(1)           | 51(1)           | 41(1)           | 4(1)            | 2(1)            | 6(1)            |
| N(18)  | 63(1)           | 54(1)           | 44(1)           | -5(1)           | 1(1)            | 14(1)           |
| N(114) | 47(1)           | 56(1)           | 52(1)           | 4(1)            | 5(1)            | 8(1)            |

Table 5. Hydrogen coordinates ( $\times 10^4$ ) and isotropic displacement parameters ( $\text{\AA}^2 \times 10^{-3}$ ) for 1.

|        | x     | y     | z     | U(eq) |
|--------|-------|-------|-------|-------|
| H(2)   | -2281 | 8146  | -142  | 59    |
| H(3)   | -1763 | 8662  | -1367 | 70    |
| H(4)   | 1530  | 9291  | -1614 | 71    |
| H(5)   | 4329  | 9387  | -637  | 70    |
| H(6)   | 3849  | 8846  | 583   | 62    |
| H(15)  | -2207 | 8937  | 1257  | 48    |
| H(19)  | 4716  | 6081  | -265  | 78    |
| H(110) | 7701  | 5588  | 500   | 72    |
| H(111) | 7935  | 5894  | 1818  | 63    |
| H(112) | 5191  | 6741  | 2305  | 53    |
| H(115) | -7247 | 10031 | 2371  | 69    |
| H(116) | -7849 | 9701  | 3623  | 70    |
| H(117) | -5568 | 8670  | 4311  | 72    |
| H(118) | -2720 | 8024  | 3714  | 60    |



## Crystallographic information for **2**

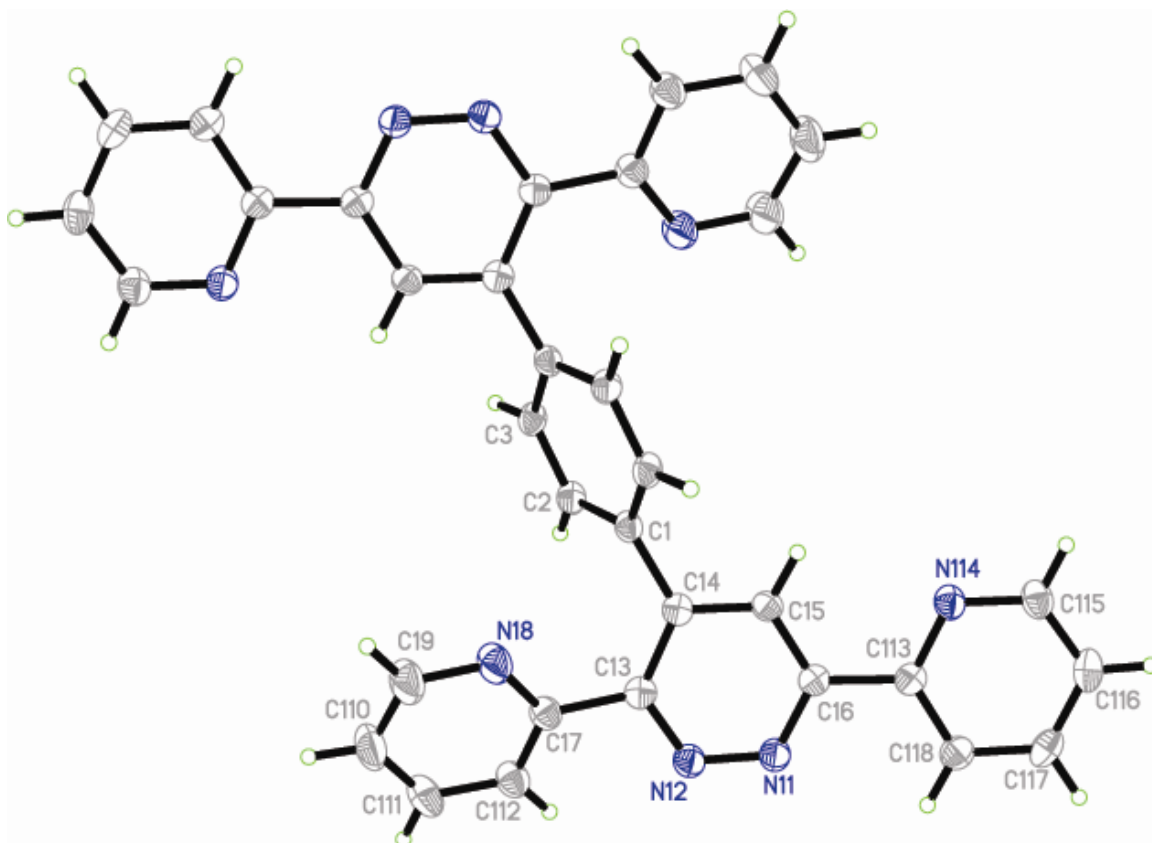

## Crystal data and structure refinement for **2**.

|                                   |                                                |                        |
|-----------------------------------|------------------------------------------------|------------------------|
| Identification code               | <b>2</b>                                       |                        |
| Empirical formula                 | C <sub>34</sub> H <sub>22</sub> N <sub>8</sub> |                        |
| Formula weight                    | 542.60                                         |                        |
| Temperature                       | 123(2) K                                       |                        |
| Wavelength                        | 0.71073 Å                                      |                        |
| Crystal system                    | Trigonal                                       |                        |
| Space group                       | R -3                                           |                        |
| Unit cell dimensions              | a = 36.000(1) Å                                | $\alpha = 90^\circ$ .  |
|                                   | b = 36.000(1) Å                                | $\beta = 90^\circ$ .   |
|                                   | c = 6.213(5) Å                                 | $\gamma = 120^\circ$ . |
| Volume                            | 6973(6) Å <sup>3</sup>                         |                        |
| Z                                 | 9                                              |                        |
| Density (calculated)              | 1.163 Mg/m <sup>3</sup>                        |                        |
| Absorption coefficient            | 0.072 mm <sup>-1</sup>                         |                        |
| F(000)                            | 2538                                           |                        |
| Crystal size                      | 0.22 x 0.16 x 0.12 mm <sup>3</sup>             |                        |
| Theta range for data collection   | 1.96 to 25.00°.                                |                        |
| Index ranges                      | -42 ≤ h ≤ 42, -42 ≤ k ≤ 42, -7 ≤ l ≤ 7         |                        |
| Reflections collected             | 23138                                          |                        |
| Independent reflections           | 2723 [R(int) = 0.0436]                         |                        |
| Completeness to theta = 25.00°    | 99.2 %                                         |                        |
| Absorption correction             | Multi scan                                     |                        |
| Max. and min. transmission        | 0.9914 and 0.9842                              |                        |
| Refinement method                 | Full-matrix least-squares on F <sup>2</sup>    |                        |
| Data / restraints / parameters    | 2723 / 0 / 194                                 |                        |
| Goodness-of-fit on F <sup>2</sup> | 1.038                                          |                        |
| Final R indices [I > 2σ(I)]       | R1 = 0.0408, wR2 = 0.1077                      |                        |
| R indices (all data)              | R1 = 0.0498, wR2 = 0.1125                      |                        |
| Largest diff. peak and hole       | 0.240 and -0.160 e.Å <sup>-3</sup>             |                        |

Table 2. Atomic coordinates ( $\times 10^4$ ) and equivalent isotropic displacement parameters ( $\text{\AA}^2 \times 10^3$ ) for datam.  $U(\text{eq})$  is defined as one third of the trace of the orthogonalized  $U^{ij}$  tensor.

|        | x       | y       | z        | U(eq) |
|--------|---------|---------|----------|-------|
| C(1)   | 3681(1) | 1616(1) | 6086(2)  | 22(1) |
| C(2)   | 3491(1) | 1485(1) | 8101(2)  | 25(1) |
| C(3)   | 3149(1) | 1538(1) | 8676(2)  | 24(1) |
| C(13)  | 4417(1) | 1656(1) | 6442(2)  | 23(1) |
| C(14)  | 4022(1) | 1525(1) | 5374(2)  | 22(1) |
| C(15)  | 3949(1) | 1275(1) | 3576(2)  | 22(1) |
| C(16)  | 4243(1) | 1151(1) | 2969(2)  | 22(1) |
| C(17)  | 4575(1) | 1950(1) | 8327(2)  | 26(1) |
| C(19)  | 4573(1) | 2492(1) | 10235(3) | 46(1) |
| C(110) | 4852(1) | 2492(1) | 11754(3) | 44(1) |
| C(111) | 5002(1) | 2211(1) | 11507(3) | 39(1) |
| C(112) | 4863(1) | 1935(1) | 9762(2)  | 31(1) |
| C(113) | 4175(1) | 882(1)  | 1030(2)  | 23(1) |
| C(115) | 3749(1) | 540(1)  | -1869(2) | 30(1) |
| C(116) | 4031(1) | 417(1)  | -2644(2) | 31(1) |
| C(117) | 4400(1) | 532(1)  | -1482(2) | 30(1) |
| C(118) | 4475(1) | 768(1)  | 384(2)   | 28(1) |
| N(11)  | 4600(1) | 1267(1) | 4099(2)  | 27(1) |
| N(12)  | 4686(1) | 1524(1) | 5799(2)  | 27(1) |
| N(18)  | 4432(1) | 2228(1) | 8535(2)  | 37(1) |
| N(114) | 3813(1) | 767(1)  | -69(2)   | 26(1) |

Table 3. Bond lengths [Å] and angles [°] for 2.

---

|                   |            |
|-------------------|------------|
| C(1)-C(2)         | 1.392(2)   |
| C(1)-C(3)#1       | 1.3930(19) |
| C(1)-C(14)        | 1.4869(18) |
| C(2)-C(3)         | 1.3803(19) |
| C(3)-C(1)#1       | 1.3930(19) |
| C(13)-N(12)       | 1.3361(18) |
| C(13)-C(14)       | 1.4168(19) |
| C(13)-C(17)       | 1.489(2)   |
| C(14)-C(15)       | 1.374(2)   |
| C(15)-C(16)       | 1.3911(19) |
| C(16)-N(11)       | 1.3343(18) |
| C(16)-C(113)      | 1.489(2)   |
| C(17)-N(18)       | 1.3413(18) |
| C(17)-C(112)      | 1.389(2)   |
| C(19)-N(18)       | 1.339(2)   |
| C(19)-C(110)      | 1.377(2)   |
| C(110)-C(111)     | 1.372(2)   |
| C(111)-C(112)     | 1.383(2)   |
| C(113)-N(114)     | 1.3413(18) |
| C(113)-C(118)     | 1.3915(19) |
| C(115)-N(114)     | 1.335(2)   |
| C(115)-C(116)     | 1.379(2)   |
| C(116)-C(117)     | 1.382(2)   |
| C(117)-C(118)     | 1.382(2)   |
| N(11)-N(12)       | 1.3338(17) |
| C(2)-C(1)-C(3)#1  | 118.54(13) |
| C(2)-C(1)-C(14)   | 121.02(11) |
| C(3)#1-C(1)-C(14) | 120.13(12) |
| C(3)-C(2)-C(1)    | 120.62(12) |
| C(2)-C(3)-C(1)#1  | 120.84(13) |
| N(12)-C(13)-C(14) | 121.73(12) |
| N(12)-C(13)-C(17) | 113.53(11) |
| C(14)-C(13)-C(17) | 124.73(12) |
| C(15)-C(14)-C(13) | 115.62(12) |

|                      |            |
|----------------------|------------|
| C(15)-C(14)-C(1)     | 118.37(12) |
| C(13)-C(14)-C(1)     | 125.94(12) |
| C(14)-C(15)-C(16)    | 120.05(12) |
| N(11)-C(16)-C(15)    | 121.69(12) |
| N(11)-C(16)-C(113)   | 116.58(12) |
| C(15)-C(16)-C(113)   | 121.73(12) |
| N(18)-C(17)-C(112)   | 122.68(13) |
| N(18)-C(17)-C(13)    | 116.90(12) |
| C(112)-C(17)-C(13)   | 120.41(12) |
| N(18)-C(19)-C(110)   | 124.05(15) |
| C(111)-C(110)-C(19)  | 118.49(15) |
| C(110)-C(111)-C(112) | 118.94(15) |
| C(111)-C(112)-C(17)  | 118.88(14) |
| N(114)-C(113)-C(118) | 122.74(13) |
| N(114)-C(113)-C(16)  | 115.43(12) |
| C(118)-C(113)-C(16)  | 121.81(12) |
| N(114)-C(115)-C(116) | 123.94(13) |
| C(115)-C(116)-C(117) | 118.22(14) |
| C(118)-C(117)-C(116) | 119.12(13) |
| C(117)-C(118)-C(113) | 118.66(13) |
| N(12)-N(11)-C(16)    | 119.20(11) |
| N(11)-N(12)-C(13)    | 121.57(11) |
| C(19)-N(18)-C(17)    | 116.94(13) |
| C(115)-N(114)-C(113) | 117.32(12) |

---

Symmetry transformations used to generate equivalent atoms:

#1  $-x+2/3, -y+1/3, -z+4/3$

Table 4. Anisotropic displacement parameters ( $\text{\AA}^2 \times 10^3$ ) for 2. The anisotropic displacement factor exponent takes the form:  $-2\pi^2 [ h^2 a^{*2}U^{11} + \dots + 2 h k a^* b^* U^{12} ]$

|        | U <sup>11</sup> | U <sup>22</sup> | U <sup>33</sup> | U <sup>23</sup> | U <sup>13</sup> | U <sup>12</sup> |
|--------|-----------------|-----------------|-----------------|-----------------|-----------------|-----------------|
| C(1)   | 25(1)           | 20(1)           | 22(1)           | -3(1)           | -4(1)           | 13(1)           |
| C(2)   | 33(1)           | 27(1)           | 21(1)           | -2(1)           | -5(1)           | 21(1)           |
| C(3)   | 31(1)           | 27(1)           | 18(1)           | 0(1)            | 0(1)            | 17(1)           |
| C(13)  | 27(1)           | 21(1)           | 23(1)           | 3(1)            | -1(1)           | 14(1)           |
| C(14)  | 27(1)           | 21(1)           | 21(1)           | 3(1)            | 0(1)            | 13(1)           |
| C(15)  | 24(1)           | 25(1)           | 20(1)           | 2(1)            | -2(1)           | 14(1)           |
| C(16)  | 25(1)           | 23(1)           | 21(1)           | 4(1)            | 1(1)            | 13(1)           |
| C(17)  | 27(1)           | 22(1)           | 27(1)           | -1(1)           | -2(1)           | 11(1)           |
| C(19)  | 52(1)           | 35(1)           | 58(1)           | -21(1)          | -18(1)          | 27(1)           |
| C(110) | 51(1)           | 35(1)           | 44(1)           | -18(1)          | -14(1)          | 19(1)           |
| C(111) | 43(1)           | 36(1)           | 34(1)           | -6(1)           | -15(1)          | 17(1)           |
| C(112) | 34(1)           | 28(1)           | 31(1)           | -2(1)           | -6(1)           | 17(1)           |
| C(113) | 27(1)           | 23(1)           | 22(1)           | 4(1)            | 2(1)            | 14(1)           |
| C(115) | 40(1)           | 29(1)           | 24(1)           | -1(1)           | -6(1)           | 20(1)           |
| C(116) | 47(1)           | 26(1)           | 21(1)           | 0(1)            | 2(1)            | 19(1)           |
| C(117) | 38(1)           | 28(1)           | 31(1)           | 2(1)            | 9(1)            | 21(1)           |
| C(118) | 29(1)           | 29(1)           | 30(1)           | 0(1)            | 1(1)            | 17(1)           |
| N(11)  | 30(1)           | 33(1)           | 24(1)           | -3(1)           | -4(1)           | 20(1)           |
| N(12)  | 30(1)           | 31(1)           | 26(1)           | -2(1)           | -4(1)           | 18(1)           |
| N(18)  | 42(1)           | 29(1)           | 46(1)           | -12(1)          | -13(1)          | 22(1)           |
| N(114) | 33(1)           | 28(1)           | 23(1)           | -1(1)           | -4(1)           | 19(1)           |

Table 5. Hydrogen coordinates ( $\times 10^4$ ) and isotropic displacement parameters ( $\text{\AA}^2 \times 10^{-3}$ ) for 2.

|        | x       | y       | z         | U(eq) |
|--------|---------|---------|-----------|-------|
| H(2A)  | 3596    | 1359    | 9090      | 30    |
| H(3A)  | 3025    | 1450    | 10064     | 29    |
| H(15A) | 3696    | 1187    | 2746      | 27    |
| H(19A) | 4475    | 2691    | 10403     | 55    |
| H(11B) | 4938    | 2682    | 12947     | 53    |
| H(11C) | 4964    | 1739    | 9549      | 37    |
| H(11D) | 3494    | 458     | -2663     | 36    |
| H(11E) | 3972    | 258     | -3942     | 37    |
| H(11F) | 4599    | 451     | -1961     | 37    |
| H(11G) | 4727    | 851     | 1211      | 34    |
| H(11I) | 5196(6) | 2201(5) | 12520(30) | 45(5) |

Crystallographic information for **3**.

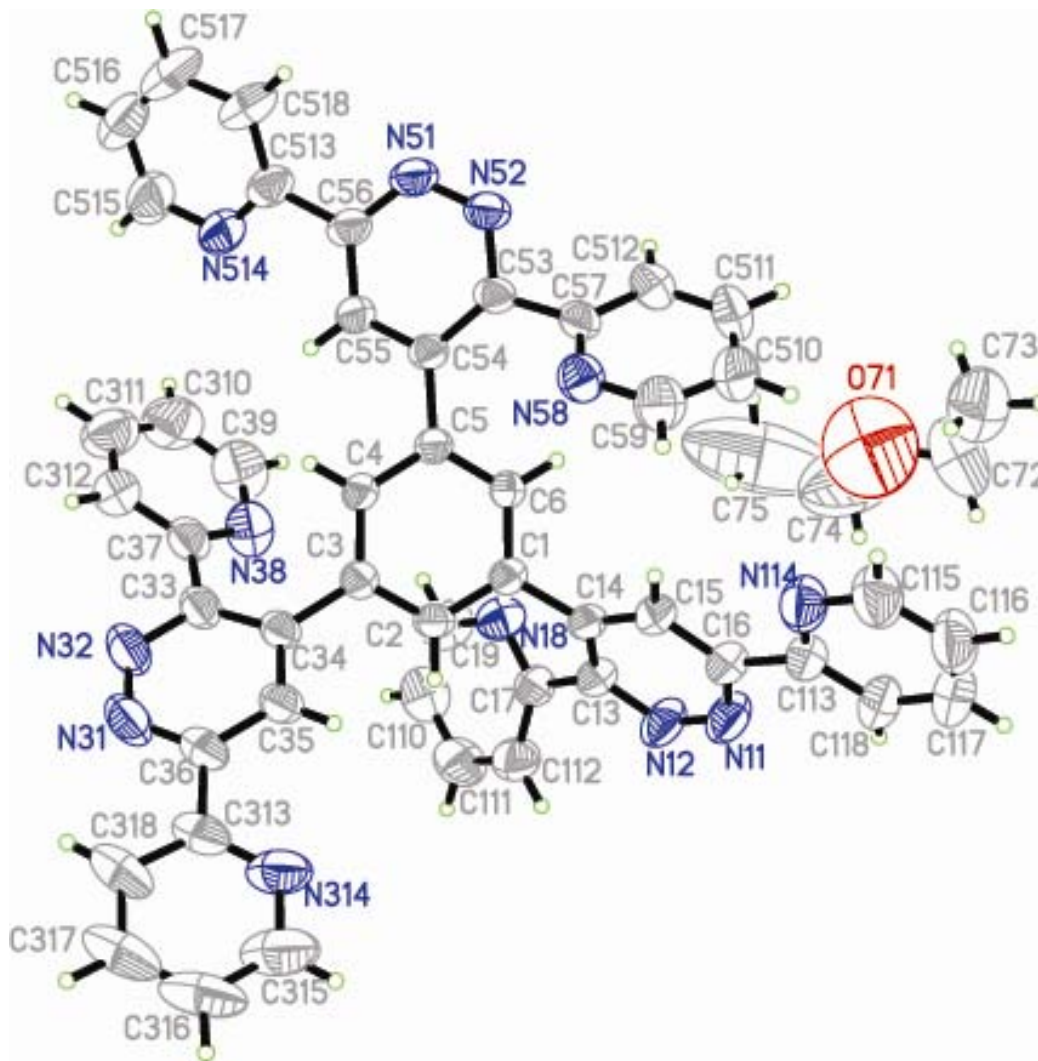



### Crystal data and structure refinement for **3**.

|                                   |                                                   |                 |
|-----------------------------------|---------------------------------------------------|-----------------|
| Identification code               | 3                                                 |                 |
| Empirical formula                 | C <sub>52</sub> H <sub>40</sub> N <sub>12</sub> O |                 |
| Formula weight                    | 848.96                                            |                 |
| Temperature                       | 123(2) K                                          |                 |
| Wavelength                        | 0.71073 Å                                         |                 |
| Crystal system                    | Triclinic                                         |                 |
| Space group                       | P -1                                              |                 |
| Unit cell dimensions              | a = 12.676(1) Å                                   | α = 73.300(2)°. |
|                                   | b = 13.597(1) Å                                   | β = 76.270(2)°. |
|                                   | c = 13.826(1) Å                                   | γ = 78.950(2)°. |
| Volume                            | 2197.7(3) Å <sup>3</sup>                          |                 |
| Z                                 | 2                                                 |                 |
| Density (calculated)              | 1.283 Mg/m <sup>3</sup>                           |                 |
| Absorption coefficient            | 0.081 mm <sup>-1</sup>                            |                 |
| F(000)                            | 888                                               |                 |
| Crystal size                      | 0.20 x 0.16 x 0.10 mm <sup>3</sup>                |                 |
| Theta range for data collection   | 1.57 to 25.15°.                                   |                 |
| Index ranges                      | -15 ≤ h ≤ 15, -16 ≤ k ≤ 16, -16 ≤ l ≤ 16          |                 |
| Reflections collected             | 23851                                             |                 |
| Independent reflections           | 7857 [R(int) = 0.0273]                            |                 |
| Completeness to theta = 25.15°    | 99.6 %                                            |                 |
| Absorption correction             | Multi scan                                        |                 |
| Max. and min. transmission        | 0.9919 and 0.9840                                 |                 |
| Refinement method                 | Full-matrix least-squares on F <sup>2</sup>       |                 |
| Data / restraints / parameters    | 7857 / 0 / 586                                    |                 |
| Goodness-of-fit on F <sup>2</sup> | 1.025                                             |                 |
| Final R indices [I > 2σ(I)]       | R1 = 0.0640, wR2 = 0.1902                         |                 |
| R indices (all data)              | R1 = 0.0782, wR2 = 0.2066                         |                 |
| Largest diff. peak and hole       | 0.712 and -0.286 e.Å <sup>-3</sup>                |                 |

Table 2. Atomic coordinates ( $\times 10^4$ ) and equivalent isotropic displacement parameters ( $\text{\AA}^2 \times 10^3$ ) for 3.  $U(\text{eq})$  is defined as one third of the trace of the orthogonalized  $U^{ij}$  tensor.

|        | x         | y        | z       | $U(\text{eq})$ |
|--------|-----------|----------|---------|----------------|
| C(1)   | 8349(2)   | 5104(2)  | 3085(2) | 39(1)          |
| C(2)   | 8064(2)   | 6171(2)  | 2805(2) | 42(1)          |
| C(3)   | 7206(2)   | 6655(2)  | 3400(2) | 39(1)          |
| C(4)   | 6621(2)   | 6053(2)  | 4282(2) | 38(1)          |
| C(5)   | 6897(2)   | 4988(2)  | 4587(1) | 37(1)          |
| C(6)   | 7773(2)   | 4518(2)  | 3975(1) | 38(1)          |
| C(13)  | 10310(2)  | 4838(2)  | 2084(2) | 49(1)          |
| C(14)  | 9228(2)   | 4594(2)  | 2393(2) | 43(1)          |
| C(15)  | 8995(2)   | 3885(2)  | 1969(2) | 49(1)          |
| C(16)  | 9809(2)   | 3476(2)  | 1261(2) | 53(1)          |
| C(17)  | 10718(2)  | 5529(2)  | 2530(2) | 49(1)          |
| C(19)  | 10733(2)  | 6017(2)  | 3971(2) | 71(1)          |
| C(33)  | 6598(2)   | 8460(2)  | 3734(2) | 50(1)          |
| C(34)  | 6887(2)   | 7793(2)  | 3067(2) | 44(1)          |
| C(35)  | 6826(2)   | 8255(2)  | 2055(2) | 49(1)          |
| C(36)  | 6470(2)   | 9310(2)  | 1757(2) | 54(1)          |
| C(37)  | 6722(2)   | 8141(2)  | 4828(2) | 54(1)          |
| C(39)  | 7696(3)   | 7142(3)  | 6032(3) | 88(1)          |
| C(53)  | 6083(2)   | 3365(2)  | 5807(2) | 42(1)          |
| C(54)  | 6278(2)   | 4406(2)  | 5579(2) | 39(1)          |
| C(55)  | 5883(2)   | 4883(2)  | 6370(2) | 45(1)          |
| C(56)  | 5305(2)   | 4351(2)  | 7302(2) | 48(1)          |
| C(57)  | 6381(2)   | 2714(2)  | 5058(2) | 46(1)          |
| C(59)  | 6420(2)   | 2583(2)  | 3444(2) | 68(1)          |
| C(72)  | 10374(13) | -395(5)  | 2837(8) | 320(9)         |
| C(73)  | 9334(5)   | -787(5)  | 2933(5) | 140(2)         |
| C(74)  | 10734(10) | 740(10)  | 3399(6) | 228(5)         |
| C(75)  | 10136(9)  | 1548(11) | 4008(9) | 323(9)         |
| C(110) | 11389(2)  | 6761(2)  | 3425(3) | 74(1)          |
| C(111) | 11734(2)  | 6872(2)  | 2394(3) | 77(1)          |
| C(112) | 11395(2)  | 6248(2)  | 1930(2) | 67(1)          |

|        |          |          |          |        |
|--------|----------|----------|----------|--------|
| C(113) | 9604(2)  | 2699(2)  | 787(2)   | 56(1)  |
| C(115) | 8373(3)  | 1758(2)  | 639(3)   | 83(1)  |
| C(116) | 9134(3)  | 1289(2)  | -34(3)   | 88(1)  |
| C(117) | 10178(3) | 1534(3)  | -282(3)  | 90(1)  |
| C(118) | 10425(3) | 2246(2)  | 127(2)   | 74(1)  |
| C(310) | 6999(4)  | 7528(3)  | 6806(3)  | 93(1)  |
| C(311) | 6144(3)  | 8246(3)  | 6563(2)  | 89(1)  |
| C(312) | 5990(3)  | 8564(2)  | 5562(2)  | 70(1)  |
| C(313) | 6421(2)  | 9848(2)  | 667(2)   | 61(1)  |
| C(315) | 6937(3)  | 9798(3)  | -1008(3) | 106(1) |
| C(316) | 6364(3)  | 10758(4) | -1335(3) | 106(1) |
| C(317) | 5809(3)  | 11270(3) | -624(3)  | 96(1)  |
| C(318) | 5833(3)  | 10822(2) | 388(3)   | 78(1)  |
| C(510) | 6926(3)  | 1598(2)  | 3634(3)  | 77(1)  |
| C(511) | 7147(3)  | 1139(2)  | 4592(3)  | 83(1)  |
| C(512) | 6876(2)  | 1706(2)  | 5332(2)  | 68(1)  |
| C(513) | 4788(2)  | 4871(2)  | 8139(2)  | 55(1)  |
| C(515) | 4787(3)  | 6168(3)  | 8885(2)  | 81(1)  |
| C(516) | 3875(3)  | 5923(3)  | 9596(2)  | 85(1)  |
| C(517) | 3393(3)  | 5124(3)  | 9568(2)  | 90(1)  |
| C(518) | 3858(2)  | 4569(3)  | 8830(2)  | 76(1)  |
| N(11)  | 10799(2) | 3777(2)  | 954(2)   | 70(1)  |
| N(12)  | 11049(2) | 4452(2)  | 1380(2)  | 68(1)  |
| N(18)  | 10397(2) | 5398(2)  | 3543(2)  | 60(1)  |
| N(31)  | 6142(2)  | 9888(2)  | 2433(2)  | 70(1)  |
| N(32)  | 6220(2)  | 9461(2)  | 3415(2)  | 68(1)  |
| N(38)  | 7584(2)  | 7451(2)  | 5048(2)  | 71(1)  |
| N(51)  | 5188(2)  | 3361(2)  | 7487(1)  | 56(1)  |
| N(52)  | 5591(2)  | 2866(1)  | 6740(1)  | 52(1)  |
| N(58)  | 6136(2)  | 3154(2)  | 4127(2)  | 55(1)  |
| N(114) | 8584(2)  | 2454(2)  | 1052(2)  | 71(1)  |
| N(314) | 6967(2)  | 9332(2)  | -17(2)   | 82(1)  |
| N(514) | 5256(2)  | 5663(2)  | 8153(2)  | 68(1)  |
| O(71)  | 9862(4)  | 445(6)   | 3285(5)  | 228(3) |

---

Table 3. Bond lengths [ $\text{\AA}$ ] and angles [ $^\circ$ ] for 3.

---

|              |          |
|--------------|----------|
| C(1)-C(6)    | 1.385(3) |
| C(1)-C(2)    | 1.389(3) |
| C(1)-C(14)   | 1.488(3) |
| C(2)-C(3)    | 1.381(3) |
| C(3)-C(4)    | 1.391(3) |
| C(3)-C(34)   | 1.486(3) |
| C(4)-C(5)    | 1.386(3) |
| C(5)-C(6)    | 1.396(3) |
| C(5)-C(54)   | 1.491(3) |
| C(13)-N(12)  | 1.332(3) |
| C(13)-C(14)  | 1.410(3) |
| C(13)-C(17)  | 1.484(3) |
| C(14)-C(15)  | 1.370(3) |
| C(15)-C(16)  | 1.395(3) |
| C(16)-N(11)  | 1.329(3) |
| C(16)-C(113) | 1.482(3) |
| C(17)-N(18)  | 1.331(3) |
| C(17)-C(112) | 1.378(3) |
| C(19)-N(18)  | 1.336(3) |
| C(19)-C(110) | 1.368(4) |
| C(33)-N(32)  | 1.334(3) |
| C(33)-C(34)  | 1.415(3) |
| C(33)-C(37)  | 1.487(3) |
| C(34)-C(35)  | 1.373(3) |
| C(35)-C(36)  | 1.391(3) |
| C(36)-N(31)  | 1.331(3) |
| C(36)-C(313) | 1.484(3) |
| C(37)-N(38)  | 1.330(3) |
| C(37)-C(312) | 1.380(4) |
| C(39)-N(38)  | 1.338(4) |
| C(39)-C(310) | 1.377(5) |
| C(53)-N(52)  | 1.338(3) |
| C(53)-C(54)  | 1.415(3) |
| C(53)-C(57)  | 1.488(3) |

|               |           |
|---------------|-----------|
| C(54)-C(55)   | 1.376(3)  |
| C(55)-C(56)   | 1.392(3)  |
| C(56)-N(51)   | 1.327(3)  |
| C(56)-C(513)  | 1.484(3)  |
| C(57)-N(58)   | 1.337(3)  |
| C(57)-C(512)  | 1.378(3)  |
| C(59)-N(58)   | 1.334(3)  |
| C(59)-C(510)  | 1.350(4)  |
| C(72)-O(71)   | 1.428(9)  |
| C(72)-C(73)   | 1.478(14) |
| C(74)-O(71)   | 1.303(10) |
| C(74)-C(75)   | 1.549(17) |
| C(110)-C(111) | 1.361(4)  |
| C(111)-C(112) | 1.378(4)  |
| C(113)-N(114) | 1.338(4)  |
| C(113)-C(118) | 1.386(4)  |
| C(115)-N(114) | 1.331(4)  |
| C(115)-C(116) | 1.373(5)  |
| C(116)-C(117) | 1.367(5)  |
| C(117)-C(118) | 1.368(4)  |
| C(310)-C(311) | 1.348(5)  |
| C(311)-C(312) | 1.376(4)  |
| C(313)-N(314) | 1.323(4)  |
| C(313)-C(318) | 1.386(4)  |
| C(315)-N(314) | 1.340(4)  |
| C(315)-C(316) | 1.375(6)  |
| C(316)-C(317) | 1.350(6)  |
| C(317)-C(318) | 1.362(5)  |
| C(510)-C(511) | 1.362(5)  |
| C(511)-C(512) | 1.394(4)  |
| C(513)-N(514) | 1.332(4)  |
| C(513)-C(518) | 1.377(4)  |
| C(515)-N(514) | 1.344(3)  |
| C(515)-C(516) | 1.354(5)  |
| C(516)-C(517) | 1.358(5)  |
| C(517)-C(518) | 1.394(4)  |

|                    |            |
|--------------------|------------|
| N(11)-N(12)        | 1.340(3)   |
| N(31)-N(32)        | 1.334(3)   |
| N(51)-N(52)        | 1.340(3)   |
| C(6)-C(1)-C(2)     | 119.67(18) |
| C(6)-C(1)-C(14)    | 120.57(18) |
| C(2)-C(1)-C(14)    | 119.66(17) |
| C(3)-C(2)-C(1)     | 120.77(18) |
| C(2)-C(3)-C(4)     | 118.81(18) |
| C(2)-C(3)-C(34)    | 119.91(18) |
| C(4)-C(3)-C(34)    | 121.21(17) |
| C(5)-C(4)-C(3)     | 121.66(17) |
| C(4)-C(5)-C(6)     | 118.39(17) |
| C(4)-C(5)-C(54)    | 118.39(17) |
| C(6)-C(5)-C(54)    | 123.15(17) |
| C(1)-C(6)-C(5)     | 120.69(18) |
| N(12)-C(13)-C(14)  | 122.5(2)   |
| N(12)-C(13)-C(17)  | 114.9(2)   |
| C(14)-C(13)-C(17)  | 122.62(19) |
| C(15)-C(14)-C(13)  | 115.92(19) |
| C(15)-C(14)-C(1)   | 120.28(19) |
| C(13)-C(14)-C(1)   | 123.71(19) |
| C(14)-C(15)-C(16)  | 119.3(2)   |
| N(11)-C(16)-C(15)  | 122.1(2)   |
| N(11)-C(16)-C(113) | 116.3(2)   |
| C(15)-C(16)-C(113) | 121.5(2)   |
| N(18)-C(17)-C(112) | 122.7(2)   |
| N(18)-C(17)-C(13)  | 115.6(2)   |
| C(112)-C(17)-C(13) | 121.7(2)   |
| N(18)-C(19)-C(110) | 123.4(3)   |
| N(32)-C(33)-C(34)  | 122.1(2)   |
| N(32)-C(33)-C(37)  | 113.6(2)   |
| C(34)-C(33)-C(37)  | 124.26(19) |
| C(35)-C(34)-C(33)  | 115.74(19) |
| C(35)-C(34)-C(3)   | 119.79(19) |
| C(33)-C(34)-C(3)   | 124.44(19) |
| C(34)-C(35)-C(36)  | 119.6(2)   |

|                      |            |
|----------------------|------------|
| N(31)-C(36)-C(35)    | 122.0(2)   |
| N(31)-C(36)-C(313)   | 116.6(2)   |
| C(35)-C(36)-C(313)   | 121.4(2)   |
| N(38)-C(37)-C(312)   | 122.5(2)   |
| N(38)-C(37)-C(33)    | 116.3(2)   |
| C(312)-C(37)-C(33)   | 121.2(2)   |
| N(38)-C(39)-C(310)   | 123.7(3)   |
| N(52)-C(53)-C(54)    | 122.4(2)   |
| N(52)-C(53)-C(57)    | 112.77(18) |
| C(54)-C(53)-C(57)    | 124.83(18) |
| C(55)-C(54)-C(53)    | 115.25(18) |
| C(55)-C(54)-C(5)     | 119.14(18) |
| C(53)-C(54)-C(5)     | 125.57(18) |
| C(54)-C(55)-C(56)    | 119.9(2)   |
| N(51)-C(56)-C(55)    | 122.0(2)   |
| N(51)-C(56)-C(513)   | 116.78(19) |
| C(55)-C(56)-C(513)   | 121.2(2)   |
| N(58)-C(57)-C(512)   | 122.7(2)   |
| N(58)-C(57)-C(53)    | 116.62(18) |
| C(512)-C(57)-C(53)   | 120.6(2)   |
| N(58)-C(59)-C(510)   | 124.5(3)   |
| O(71)-C(72)-C(73)    | 94.3(9)    |
| O(71)-C(74)-C(75)    | 97.1(9)    |
| C(111)-C(110)-C(19)  | 118.7(3)   |
| C(110)-C(111)-C(112) | 119.2(3)   |
| C(17)-C(112)-C(111)  | 118.6(3)   |
| N(114)-C(113)-C(118) | 122.5(2)   |
| N(114)-C(113)-C(16)  | 115.6(2)   |
| C(118)-C(113)-C(16)  | 121.9(2)   |
| N(114)-C(115)-C(116) | 124.0(3)   |
| C(117)-C(116)-C(115) | 118.2(3)   |
| C(116)-C(117)-C(118) | 119.5(3)   |
| C(117)-C(118)-C(113) | 118.8(3)   |
| C(311)-C(310)-C(39)  | 118.3(3)   |
| C(310)-C(311)-C(312) | 119.5(3)   |
| C(311)-C(312)-C(37)  | 118.9(3)   |

|                      |            |
|----------------------|------------|
| N(314)-C(313)-C(318) | 122.3(3)   |
| N(314)-C(313)-C(36)  | 115.6(2)   |
| C(318)-C(313)-C(36)  | 122.1(3)   |
| N(314)-C(315)-C(316) | 123.6(4)   |
| C(317)-C(316)-C(315) | 118.6(3)   |
| C(316)-C(317)-C(318) | 119.2(3)   |
| C(317)-C(318)-C(313) | 119.4(4)   |
| C(59)-C(510)-C(511)  | 118.5(3)   |
| C(510)-C(511)-C(512) | 119.4(3)   |
| C(57)-C(512)-C(511)  | 117.9(3)   |
| N(514)-C(513)-C(518) | 122.7(2)   |
| N(514)-C(513)-C(56)  | 115.9(2)   |
| C(518)-C(513)-C(56)  | 121.4(3)   |
| N(514)-C(515)-C(516) | 124.0(4)   |
| C(515)-C(516)-C(517) | 118.4(3)   |
| C(516)-C(517)-C(518) | 119.5(3)   |
| C(513)-C(518)-C(517) | 118.1(3)   |
| C(16)-N(11)-N(12)    | 119.2(2)   |
| C(13)-N(12)-N(11)    | 120.7(2)   |
| C(17)-N(18)-C(19)    | 117.4(2)   |
| C(36)-N(31)-N(32)    | 119.4(2)   |
| N(31)-N(32)-C(33)    | 121.0(2)   |
| C(37)-N(38)-C(39)    | 117.0(3)   |
| C(56)-N(51)-N(52)    | 119.32(18) |
| C(53)-N(52)-N(51)    | 120.83(19) |
| C(59)-N(58)-C(57)    | 117.0(2)   |
| C(115)-N(114)-C(113) | 117.1(3)   |
| C(313)-N(314)-C(315) | 116.9(3)   |
| C(513)-N(514)-C(515) | 117.2(3)   |
| C(74)-O(71)-C(72)    | 99.0(9)    |

---

Symmetry transformations used to generate equivalent atoms:



Table 4. Anisotropic displacement parameters ( $\text{\AA}^2 \times 10^3$ ) for 3. The anisotropic displacement factor exponent takes the form:  $-2\pi^2 [h^2 a^{*2} U^{11} + \dots + 2 h k a^* b^* U^{12}]$

|        | $U^{11}$ | $U^{22}$ | $U^{33}$ | $U^{23}$ | $U^{13}$ | $U^{12}$ |
|--------|----------|----------|----------|----------|----------|----------|
| C(1)   | 36(1)    | 42(1)    | 37(1)    | -10(1)   | -2(1)    | -5(1)    |
| C(2)   | 41(1)    | 42(1)    | 36(1)    | -4(1)    | -2(1)    | -8(1)    |
| C(3)   | 39(1)    | 37(1)    | 40(1)    | -8(1)    | -6(1)    | -4(1)    |
| C(4)   | 36(1)    | 38(1)    | 37(1)    | -9(1)    | -3(1)    | 0(1)     |
| C(5)   | 35(1)    | 38(1)    | 34(1)    | -6(1)    | -5(1)    | -4(1)    |
| C(6)   | 37(1)    | 35(1)    | 39(1)    | -9(1)    | -4(1)    | -2(1)    |
| C(13)  | 44(1)    | 52(1)    | 46(1)    | -13(1)   | 3(1)     | -6(1)    |
| C(14)  | 41(1)    | 43(1)    | 37(1)    | -7(1)    | 0(1)     | -3(1)    |
| C(15)  | 45(1)    | 50(1)    | 47(1)    | -15(1)   | 2(1)     | -7(1)    |
| C(16)  | 51(1)    | 54(1)    | 49(1)    | -17(1)   | 0(1)     | -4(1)    |
| C(17)  | 38(1)    | 52(1)    | 53(1)    | -14(1)   | -3(1)    | -3(1)    |
| C(19)  | 71(2)    | 92(2)    | 62(2)    | -23(2)   | -21(1)   | -19(2)   |
| C(33)  | 51(1)    | 38(1)    | 59(1)    | -10(1)   | -9(1)    | -7(1)    |
| C(34)  | 41(1)    | 37(1)    | 48(1)    | -4(1)    | -5(1)    | -8(1)    |
| C(35)  | 49(1)    | 41(1)    | 51(1)    | -4(1)    | -6(1)    | -9(1)    |
| C(36)  | 51(1)    | 42(1)    | 62(1)    | 3(1)     | -13(1)   | -11(1)   |
| C(37)  | 64(2)    | 41(1)    | 59(1)    | -11(1)   | -12(1)   | -12(1)   |
| C(39)  | 106(3)   | 88(2)    | 81(2)    | -21(2)   | -45(2)   | -3(2)    |
| C(53)  | 35(1)    | 40(1)    | 43(1)    | -1(1)    | -5(1)    | -2(1)    |
| C(54)  | 35(1)    | 39(1)    | 37(1)    | -3(1)    | -5(1)    | -1(1)    |
| C(55)  | 46(1)    | 43(1)    | 37(1)    | -6(1)    | -2(1)    | -1(1)    |
| C(56)  | 42(1)    | 53(1)    | 37(1)    | -2(1)    | -4(1)    | 0(1)     |
| C(57)  | 41(1)    | 38(1)    | 54(1)    | -6(1)    | -2(1)    | -9(1)    |
| C(59)  | 75(2)    | 72(2)    | 68(2)    | -26(1)   | -17(1)   | -16(1)   |
| C(72)  | 530(20)  | 96(5)    | 271(11)  | -74(6)   | 117(13)  | -89(8)   |
| C(73)  | 141(4)   | 122(4)   | 156(5)   | -57(4)   | -6(4)    | -5(3)    |
| C(74)  | 237(11)  | 346(15)  | 131(6)   | -70(7)   | -14(6)   | -123(10) |
| C(75)  | 270(12)  | 408(18)  | 287(13)  | 132(12)  | -157(11) | -244(14) |
| C(110) | 71(2)    | 75(2)    | 89(2)    | -26(2)   | -34(2)   | -12(2)   |
| C(111) | 71(2)    | 69(2)    | 92(2)    | -14(2)   | -14(2)   | -28(2)   |
| C(112) | 62(2)    | 70(2)    | 65(2)    | -16(1)   | 3(1)     | -21(1)   |

|        |        |        |        |        |        |        |
|--------|--------|--------|--------|--------|--------|--------|
| C(113) | 62(2)  | 52(1)  | 52(1)  | -18(1) | -5(1)  | -2(1)  |
| C(115) | 88(2)  | 73(2)  | 98(2)  | -36(2) | -18(2) | -15(2) |
| C(116) | 120(3) | 66(2)  | 90(2)  | -39(2) | -25(2) | -8(2)  |
| C(117) | 106(3) | 81(2)  | 89(2)  | -51(2) | -3(2)  | -2(2)  |
| C(118) | 80(2)  | 71(2)  | 71(2)  | -36(2) | 3(1)   | -4(1)  |
| C(310) | 119(3) | 103(3) | 62(2)  | -16(2) | -26(2) | -25(2) |
| C(311) | 104(3) | 100(3) | 62(2)  | -24(2) | 1(2)   | -26(2) |
| C(312) | 74(2)  | 61(2)  | 67(2)  | -16(1) | -1(1)  | -9(1)  |
| C(313) | 54(1)  | 55(1)  | 64(2)  | 11(1)  | -14(1) | -18(1) |
| C(315) | 97(3)  | 130(3) | 61(2)  | 14(2)  | -5(2)  | -18(2) |
| C(316) | 99(3)  | 118(3) | 74(2)  | 44(2)  | -32(2) | -38(2) |
| C(317) | 92(2)  | 73(2)  | 105(3) | 37(2)  | -45(2) | -29(2) |
| C(318) | 82(2)  | 50(1)  | 93(2)  | 17(1)  | -38(2) | -16(1) |
| C(510) | 92(2)  | 65(2)  | 81(2)  | -35(2) | -4(2)  | -19(2) |
| C(511) | 97(2)  | 41(1)  | 101(2) | -22(2) | -2(2)  | -1(1)  |
| C(512) | 80(2)  | 43(1)  | 67(2)  | -5(1)  | -6(1)  | 0(1)   |
| C(513) | 54(1)  | 65(2)  | 35(1)  | -5(1)  | -5(1)  | 5(1)   |
| C(515) | 104(2) | 78(2)  | 53(2)  | -23(1) | -6(2)  | 5(2)   |
| C(516) | 79(2)  | 108(3) | 55(2)  | -30(2) | -4(2)  | 21(2)  |
| C(517) | 61(2)  | 137(3) | 57(2)  | -30(2) | 14(1)  | 0(2)   |
| C(518) | 55(2)  | 109(2) | 52(2)  | -21(2) | 8(1)   | -10(2) |
| N(11)  | 58(1)  | 83(2)  | 73(1)  | -42(1) | 15(1)  | -16(1) |
| N(12)  | 50(1)  | 84(2)  | 72(1)  | -40(1) | 16(1)  | -16(1) |
| N(18)  | 57(1)  | 73(1)  | 52(1)  | -15(1) | -9(1)  | -15(1) |
| N(31)  | 90(2)  | 38(1)  | 75(2)  | -3(1)  | -23(1) | -3(1)  |
| N(32)  | 91(2)  | 38(1)  | 72(1)  | -10(1) | -19(1) | -3(1)  |
| N(38)  | 81(2)  | 68(1)  | 72(2)  | -24(1) | -31(1) | 2(1)   |
| N(51)  | 54(1)  | 57(1)  | 41(1)  | 0(1)   | 1(1)   | -6(1)  |
| N(52)  | 50(1)  | 47(1)  | 47(1)  | 1(1)   | -2(1)  | -7(1)  |
| N(58)  | 58(1)  | 53(1)  | 57(1)  | -15(1) | -15(1) | -7(1)  |
| N(114) | 71(2)  | 68(1)  | 81(2)  | -34(1) | -8(1)  | -11(1) |
| N(314) | 74(2)  | 91(2)  | 55(1)  | 12(1)  | -7(1)  | -7(1)  |
| N(514) | 83(2)  | 68(1)  | 44(1)  | -15(1) | 2(1)   | -3(1)  |
| O(71)  | 139(4) | 254(7) | 299(8) | -75(6) | -67(4) | -8(4)  |

Table 5. Hydrogen coordinates ( $\times 10^4$ ) and isotropic displacement parameters ( $\text{\AA}^2 \times 10^{-3}$ ) for 3.

|        | x     | y     | z     | U(eq) |
|--------|-------|-------|-------|-------|
| H(2)   | 8455  | 6564  | 2209  | 50    |
| H(4)   | 6031  | 6373  | 4677  | 46    |
| H(6)   | 7970  | 3805  | 4168  | 45    |
| H(15)  | 8301  | 3678  | 2152  | 58    |
| H(19)  | 10510 | 5938  | 4677  | 86    |
| H(35)  | 7020  | 7864  | 1572  | 59    |
| H(39)  | 8277  | 6638  | 6204  | 106   |
| H(55)  | 6002  | 5559  | 6284  | 54    |
| H(59)  | 6260  | 2884  | 2792  | 82    |
| H(72A) | 10870 | -887  | 3237  | 384   |
| H(72B) | 10743 | -165  | 2127  | 384   |
| H(73A) | 8991  | -981  | 3646  | 210   |
| H(73B) | 9482  | -1381 | 2654  | 210   |
| H(73C) | 8855  | -256  | 2562  | 210   |
| H(74A) | 11176 | 1053  | 2745  | 274   |
| H(74B) | 11180 | 180   | 3794  | 274   |
| H(75A) | 9683  | 2071  | 3600  | 485   |
| H(75B) | 10667 | 1863  | 4169  | 485   |
| H(75C) | 9688  | 1210  | 4635  | 485   |
| H(110) | 11595 | 7183  | 3752  | 89    |
| H(111) | 12193 | 7363  | 2007  | 92    |
| H(112) | 11619 | 6311  | 1226  | 80    |
| H(115) | 7667  | 1579  | 818   | 99    |
| H(116) | 8945  | 817   | -314  | 105   |
| H(117) | 10716 | 1219  | -726  | 108   |
| H(118) | 11130 | 2423  | -35   | 89    |
| H(310) | 7114  | 7299  | 7479  | 111   |
| H(311) | 5663  | 8524  | 7069  | 107   |
| H(312) | 5402  | 9056  | 5383  | 84    |
| H(315) | 7326  | 9452  | -1502 | 127   |

|        |      |       |       |     |
|--------|------|-------|-------|-----|
| H(316) | 6358 | 11048 | -2031 | 127 |
| H(317) | 5414 | 11921 | -824  | 116 |
| H(318) | 5460 | 11166 | 888   | 93  |
| H(510) | 7118 | 1240  | 3123  | 92  |
| H(511) | 7476 | 455   | 4750  | 99  |
| H(512) | 7023 | 1413  | 5990  | 81  |
| H(515) | 5108 | 6721  | 8904  | 97  |
| H(516) | 3586 | 6292  | 10092 | 102 |
| H(517) | 2757 | 4948  | 10037 | 108 |
| H(518) | 3550 | 4011  | 8805  | 91  |

---

Hydrogen bond table:

|                | <b>1</b> |      |     | <b>2</b> |      |      | <b>3</b> |      |     |
|----------------|----------|------|-----|----------|------|------|----------|------|-----|
| <b>C-H...N</b> | 2.83     | 3.66 | 149 | 2.53     | 3.32 | 142  | 2.55     | 3.48 | 178 |
|                | 3.00     | 3.79 | 143 | 2.57     | 3.28 | 134  | 2.62     | 3.37 | 139 |
|                | 3.03     | 3.61 | 122 | 2.68     | 3.51 | 149  | 2.72     | 3.47 | 138 |
|                |          |      |     | 2.90     | 3.78 | 158  | 2.75     | 3.51 | 140 |
|                |          |      |     |          |      |      | 2.75     | 3.53 | 142 |
|                |          |      |     |          |      |      | 2.76     | 3.31 | 119 |
|                |          |      |     |          |      |      | 2.88     | 3.61 | 137 |
|                |          |      |     |          |      |      | 2.91     | 3.81 | 162 |
|                |          |      |     |          |      |      | 2.92     | 3.80 | 157 |
|                |          |      |     |          |      |      | 2.93     | 3.75 | 148 |
|                |          |      |     |          |      | 2.99 | 3.76     | 139  |     |

## Torsion angles

| <b>1</b>                |        |
|-------------------------|--------|
| N11 – C16 – C113 – C118 | 0.16   |
| C15 – C16 – C113 – N114 | 1.21   |
| N2 – C13 – C17 – C112   | -30.39 |
| C14 – C13 – C17 – N18   | -30.84 |
| C13 – C14 – C1 – C6     | -58.82 |
| C15 – C14 – C1 – C12    | -56.75 |
| <b>2</b>                |        |
| N114 – C113 – C16 – C15 | 0.29   |
| C118 – C113 – C16 – N11 | 2.12   |
| C112 – C17 – C13 – N12  | 25.76  |
| N18 – C17 – C13 – C14   | 25.71  |
| C15 – C14 – C1 – C3     | 54.67  |
| C13 – C14 – C1 – C2     | 57.92  |
| <b>3</b>                |        |
| N38 – C37 – C33 – C34   | 34.92  |
| N312 – C37 – C33 – N32  | 35.75  |
| N31 – C36 – C313 – C318 | -14.95 |
| C35 – C36 – C313 – N314 | -15.38 |
| C33 – C34 – C3 – C4     | 44.46  |
| C35 – C34 – C3 – C2     | 43.47  |
| N514 – C513 – C56 – C55 | -27.21 |
| C518 – C513 – C56 – N51 | -29.64 |
| C512 – C57 – C53 – N52  | -45.44 |
| N58 – C57 – C53 – C54   | -45.30 |
| C6 – C5 – C54 – C53     | -32.17 |
| C4 – C5 – C54 – C55     | -31.67 |
| N18 – C17 – C13 – C14   | 41.11  |
| C112 – C17 – C13 – N12  | 41.39  |
| N114 – C113 – C16 – C15 | 2.56   |
| C118 – C113 – C16 – N11 | 5.28   |
| C2 – C1 – C14 – C13     | 58.39  |
| C6 – C1 – C14 – C15     | 58.51  |

## Synthesis and spectral analysis:

Phenylacetylene was purchased from Aldrich chemicals and used without further purification. The synthetic details and spectroscopic reports for di- and tri-acetylenes (by Sonogashira coupling), 3,6-di(2-pyridyl)-1,2,4,5-tetrazine and **3** are previously reported.<sup>1-4</sup>

Single crystals of **1**, **2** and **3** were carefully chosen after they were viewed through a polarizing microscope. The crystals were glued to a thin glass fiber using NIH immersion oil and mounted on a diffractometer equipped with an APEX CCD area detector. The data collections were carried out at 123K and no extraordinary methods were employed, except that the crystals were smeared in the immersion oil to protect them from ambient laboratory conditions. The intensity data were processed using Bruker's suite of data processing programs (SAINT), and absorption corrections were applied using SADABS.<sup>5</sup> The structure solution of all the complexes was carried out by direct methods, and refinements were performed by full-matrix least-squares on  $F^2$  using the SHELXTL-PLUS suite of programs.<sup>6</sup> All the non-hydrogen atoms were refined anisotropically and the hydrogen atoms obtained from Fourier maps were refined isotropically. In the case of **2**, the electron density associated with the disordered solvent water molecules were removed from the reflection file using SQUEEZE option in PLATON and refined. The resulting \*.sqf file was appended to the CIF file. Intermolecular interactions were computed using the PLATON program.<sup>7</sup>

Thermogravimetric analyses of **1-3** were carried out using Perkin-Elmer Pyris 1 TG analyzer under inert atmosphere with a heating rate of 5 °C/min. Absorbance spectra were obtained on a Shimidzu UV/Vis spectrometer recorded in the range 230-800 nm, using chloroform as the solvent.

4-Phenyl-3,6-di(2-pyridyl) pyridazine, **1**: Phenylacetylene (0.102g, 1 mmol) in toluene (5 mL) was added to a solution of 3,6-di(2-pyridyl)-1,2,4,5-tetrazine (Bptz) (0.236g, 1 mmol) in toluene (5 mL). The reaction mixture was stirred for 15 minutes and was heated in a pressure tube at 140 °C for 48 hours. The resultant yellow solution was brought to room temperature and the solvent was removed under vacuum. The product was purified by column chromatography (Silica 60; ethyl acetate (90%), methanol (10%). Yield: 0.27g (88%). <sup>1</sup>H-NMR (CDCl<sub>3</sub>, δ/ppm, J/Hz): 8.83 (d, 1H, H<sup>3</sup>, J = 8.03), 8.75 (d, 1H, H<sup>6</sup>, J = 4.52), 8.69 (s, 1H, H<sup>13</sup>), 8.50 (dd, 1H, H<sup>6'</sup>, J = 4.52, J = 1.01), 8.00-7.90 (m, 2H, H<sup>3',4'</sup>), 7.82 (dt, 1H, H<sup>4'</sup>, J = 7.53, J = 2.01), 7.44 (m, 1H, H<sup>5</sup>), 7.34 (m, 3H, H<sup>5',9'</sup>), 7.30 (m, 3H, H<sup>8,10</sup>). <sup>13</sup>C NMR (CDCl<sub>3</sub>, δ/ppm): 158.41 (1C, C<sup>q</sup>), 157.76 (1C, C<sup>q</sup>), 155.85 (1C, C<sup>11</sup>), 153.41 (1C, C<sup>14</sup>), 149.49 (1C, C<sup>6</sup>), 149.07 (1C, C<sup>6'</sup>), 140.55 (1C, C<sup>12</sup>), 137.24 (1C, C<sup>3'</sup>), 136.97 (1C, C<sup>7</sup>), 136.57 (1C, C<sup>4'</sup>), 128.94 (2C, C<sup>9</sup>), 128.45 (3C, C<sup>8,10</sup>), 125.68 (1C, C<sup>13</sup>), 124.92 (1C, C<sup>4</sup>), 124.84 (1C, C<sup>5</sup>), 123.39 (1C, C<sup>5'</sup>) and 121.92 (1C, C<sup>3</sup>). ESI-MS (CH<sub>3</sub>OH); calculated for C<sub>20</sub>H<sub>15</sub>N<sub>4</sub>: [MH]<sup>+</sup> 311.1297, found: 311.1299.

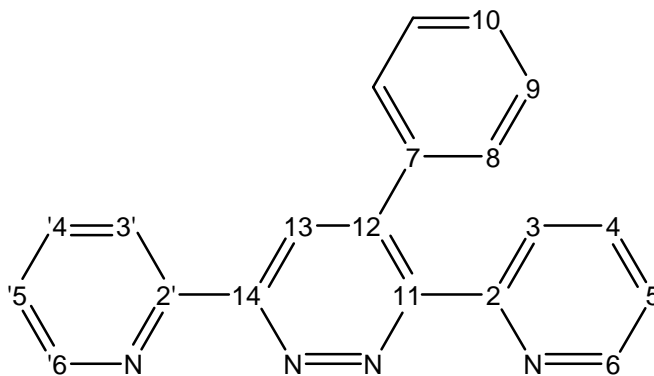

1,4-Benzene-bis(3,6-di(2-pyridyl)pyridazine), **2**: The 3,6-di(2-pyridyl)-1,2,4,5-tetrazine (Bptz) (0.472g, 2 mmol) was dissolved in toluene (5 mL) to give a deep purple solution to which 1,4-benzene-diacetylene (0.126g, 1 mmol) in toluene (5 mL) was added. The resultant solution was stirred for 15 minutes and transferred to a pressure tube (25 mL) and the reaction mixture was heated at 160 °C for 48 hours, during which time, the reaction mixture turned yellow. After cooling to room temperature, the solvent was removed under vacuum and the product was purified by column chromatography (silica gel 60; CH<sub>2</sub>Cl<sub>2</sub> (70%), acetone (30%)). Yield: 0.41g (76%). <sup>1</sup>H-NMR (CDCl<sub>3</sub>, δ/ppm, J/Hz): 8.84 (d, 2H, H<sup>3</sup> J = 8.03), 8.79 (d, 2H, H<sup>6</sup> J = 4.52), 8.72 (s, 2H, H<sup>11</sup>), 8.53 (d, 2H, H<sup>6'</sup> J = 4.52), 8.00-7.96 (m, 4H, H<sup>4</sup>, H<sup>3'</sup>), 7.89 (dt, 2H, H<sup>4'</sup> J = 7.53, J = 1.50), 7.48 (m, 2H, H<sup>5</sup>), 7.35 (m, 2H, H<sup>5'</sup>), 7.27 (s, 4H, H<sup>8</sup>). <sup>13</sup>C NMR (CDCl<sub>3</sub>, δ/ppm): 157.58 (2C C<sup>9</sup>), 157.15 (2C C<sup>9</sup>), 154.90 (2C C<sup>9</sup>), 152.67 (2C C<sup>9</sup>), 148.86 (2C C<sup>6</sup>), 148.42 (2C C<sup>6'</sup>), 139.42 (2C C<sup>10</sup>), 137.11 (2C C<sup>4</sup>), 136.67 (2C C<sup>4'</sup>), 136.58 (2C C<sup>7</sup>), 128.66 (2C C<sup>8</sup>), 125.19 (2C C<sup>11</sup>), 124.58 (2C C<sup>5</sup>), 124.52 (2C C<sup>3'</sup>), 123.20 (2C C<sup>5'</sup>), 121.68 (2C C<sup>3</sup>). ESI-MS (CH<sub>3</sub>OH); calculated for C<sub>34</sub>H<sub>22</sub>N<sub>8</sub>: [MH]<sup>+</sup> 543.2046, found: 543. 2067

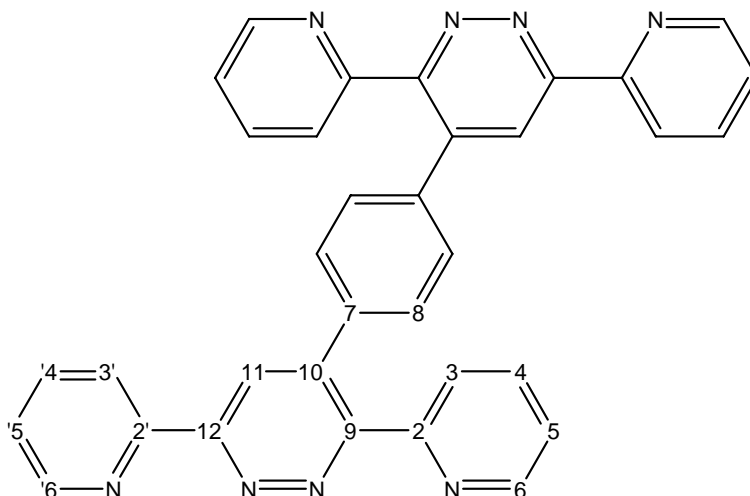

## References:

- (1) M. J. Plater, J. P. Sinclair, S. Aiken, T. Gelbrich, M. B. Hursthouse, *Tetrahedron* 2004, **60**, 6385.
- (2) E. Weber, M. Hecker, E. Koepf, W. Orliag, M. Czugler, I. Csöreg, *J. Chem. Soc., Perkin Trans. II* 1988, 1251.
- (3) Y. F. Suen, H. Hope, M. H. Nantz, M. J. Haddadin, M. J. Kurth, *J. Org. Chem.* 2005, **70**, 8468.
- (4) E. C. Constable, C. E. Housecroft, M. Neuburger, S. Reymann, S. Schaffner, *Eur. J. Org. Chem.* 2008, 1597.
- (5) G. M. Sheldrick, SADABS, Area Detector Correction. 2002. Madison, WI, Siemens Industrial Automation, Inc.
- (6) a) G. M. Sheldrick, SAINT Area Detector Integration Software. 1998. Madison, WI, Siemens Industrial Automation, Inc. (b) G. M. Sheldrick, SHELX97 programs for crystal Structure Analysis (97-2) 1998. Institut für Anorganische Chemie der Universität. (c) G. M. Sheldrick, XPREP (V5.1) 1997 Madison, WI, Bruker Analytical X-Ray Systems.
- (7) A. L. Spek, PLATON. *Acta Crystallogr., Sect. A*, 1990, **A46**, C34.



## Additional figures for 1

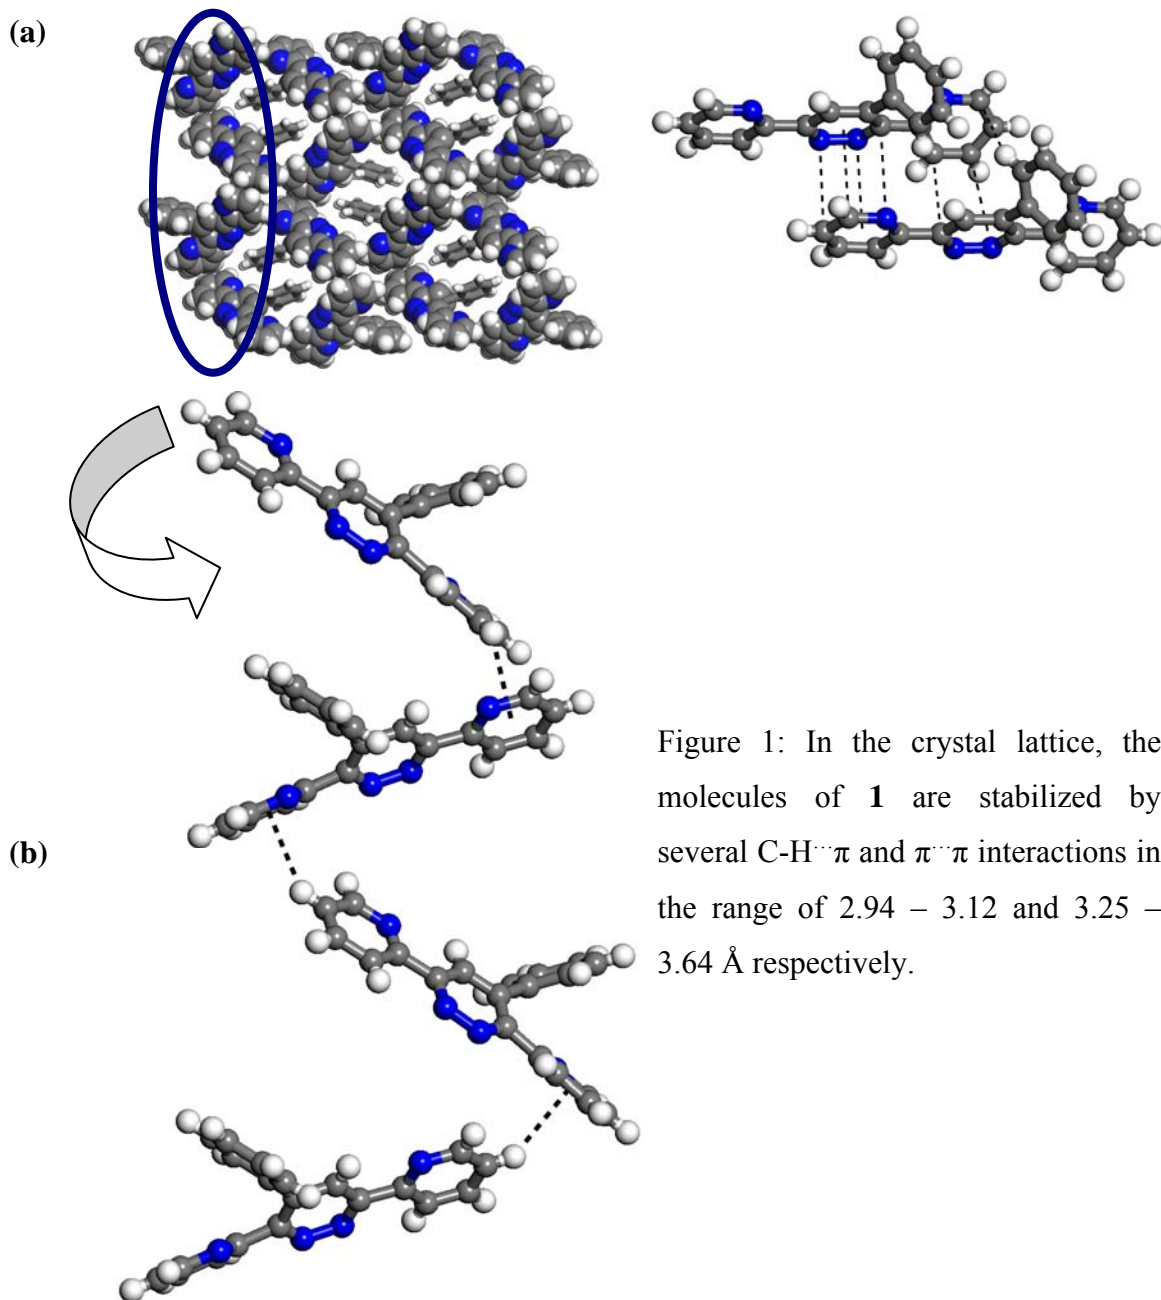

Figure 1: In the crystal lattice, the molecules of **1** are stabilized by several C-H $\cdots$  $\pi$  and  $\pi\cdots\pi$  interactions in the range of 2.94 – 3.12 and 3.25 – 3.64 Å respectively.

## Additional figures for 2

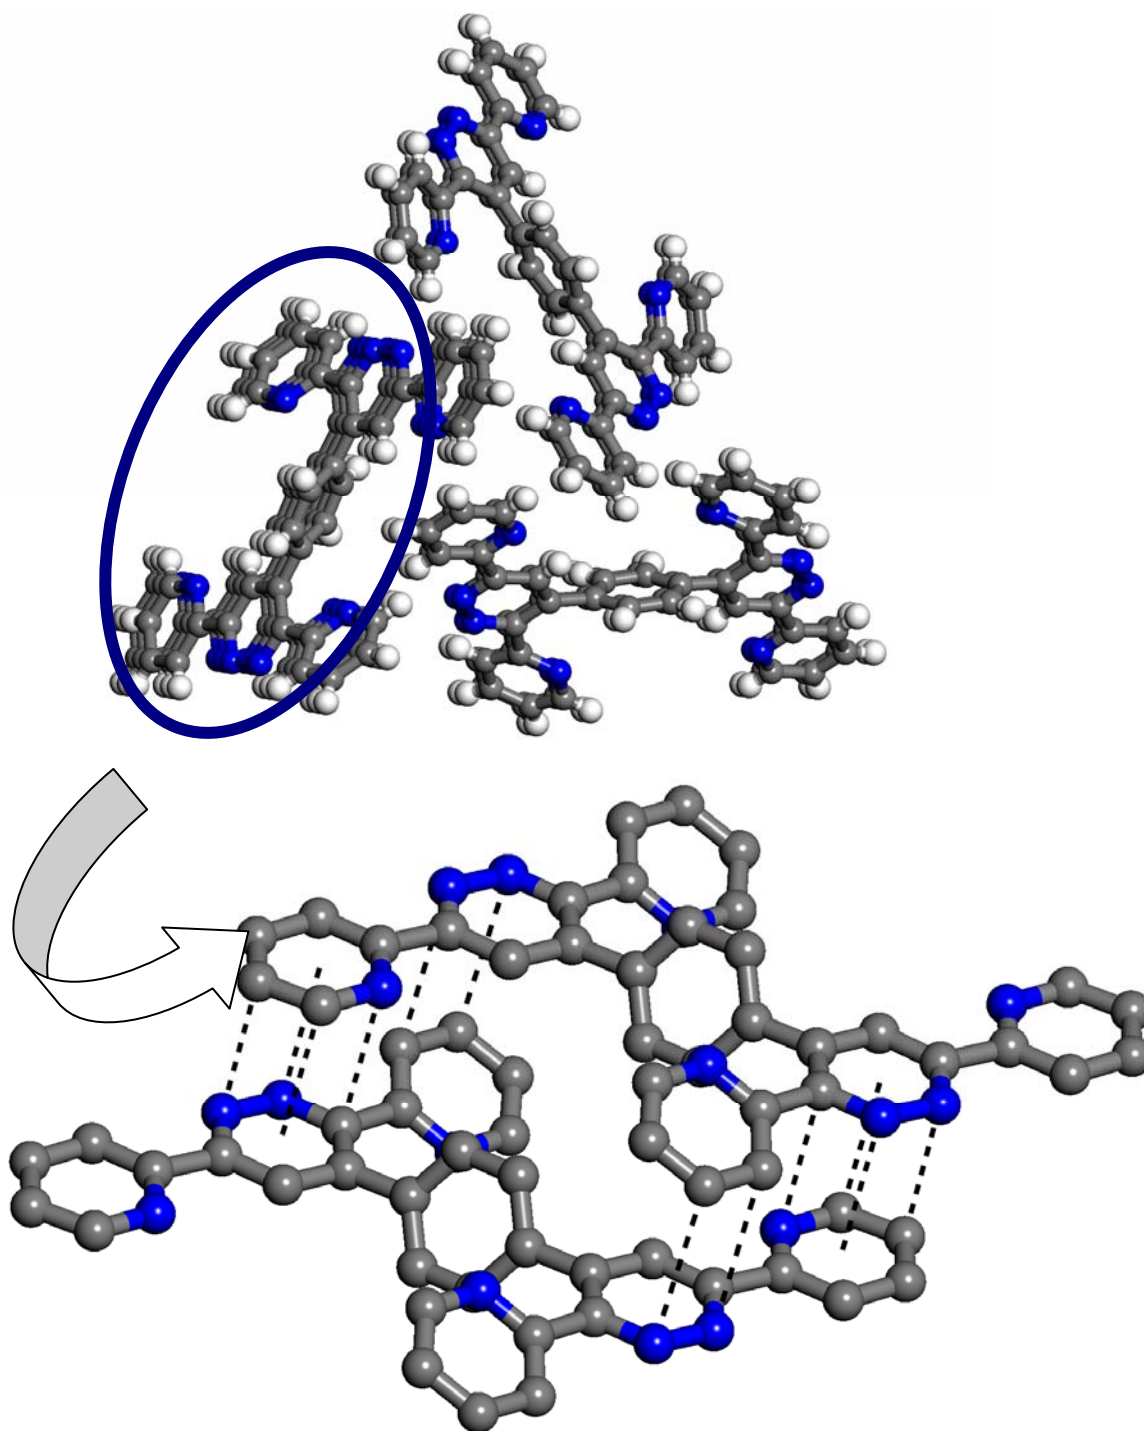

Figure 2: Each side of the triangular units are made of ligand **2**, stabilized by several  $\pi\cdots\pi$  interactions in the range of 3.37 – 3.56 Å

### Additional figures for 3

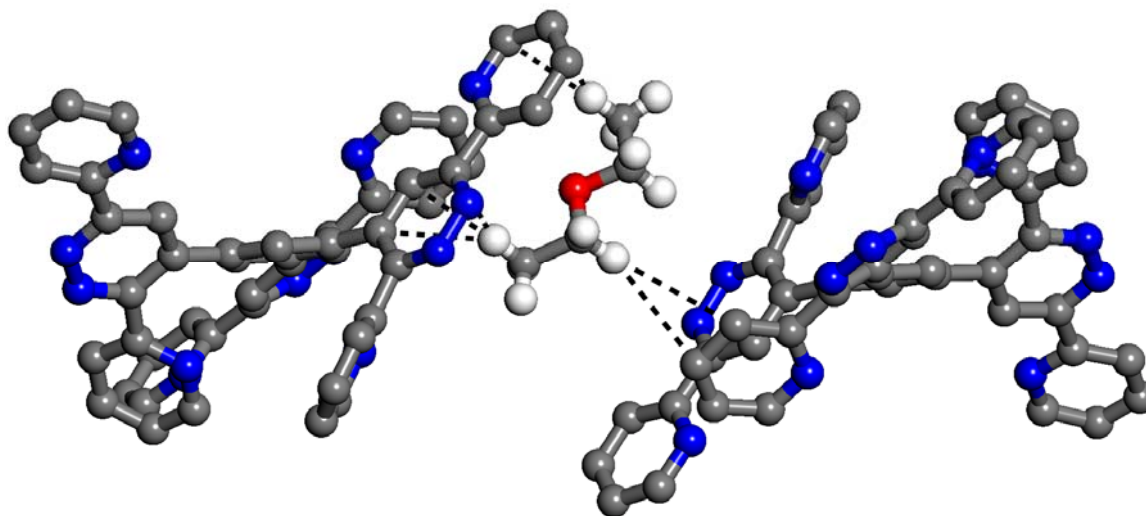

Figure 3: In the crystal structure of **3**, the solvent (ether) plays a major role in the stabilization of the framework, through the formation of several C-H... $\pi$  interactions (2.97 – 3.43 Å)

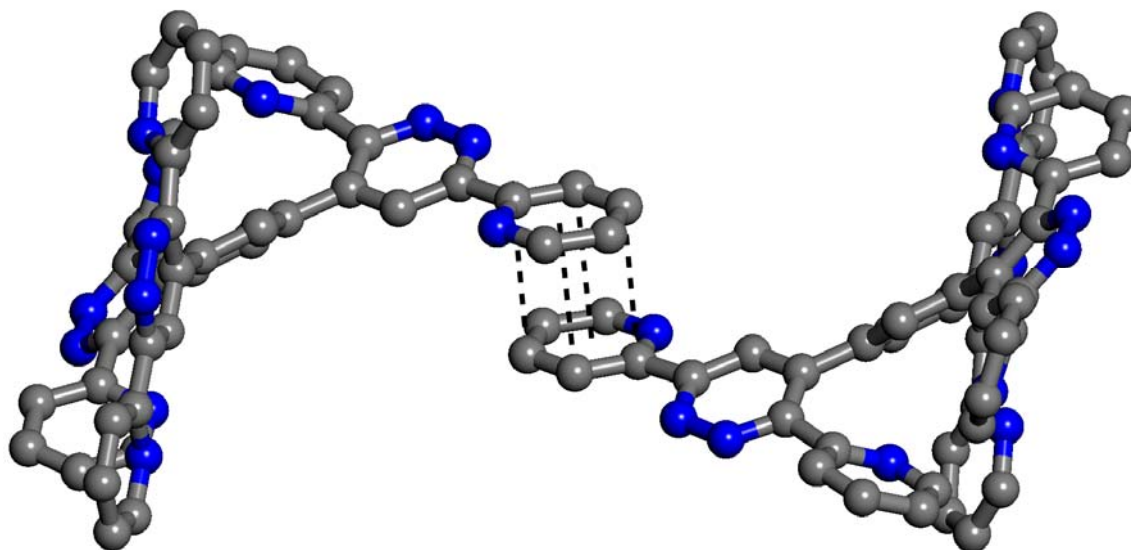

Figure 4: In addition to several C-H...N hydrogen bonds formed by the pyridazine and 2-pyridyl rings, the system is stabilized by  $\pi$ ... $\pi$  interactions in the range 3.45 – 3.50 Å.

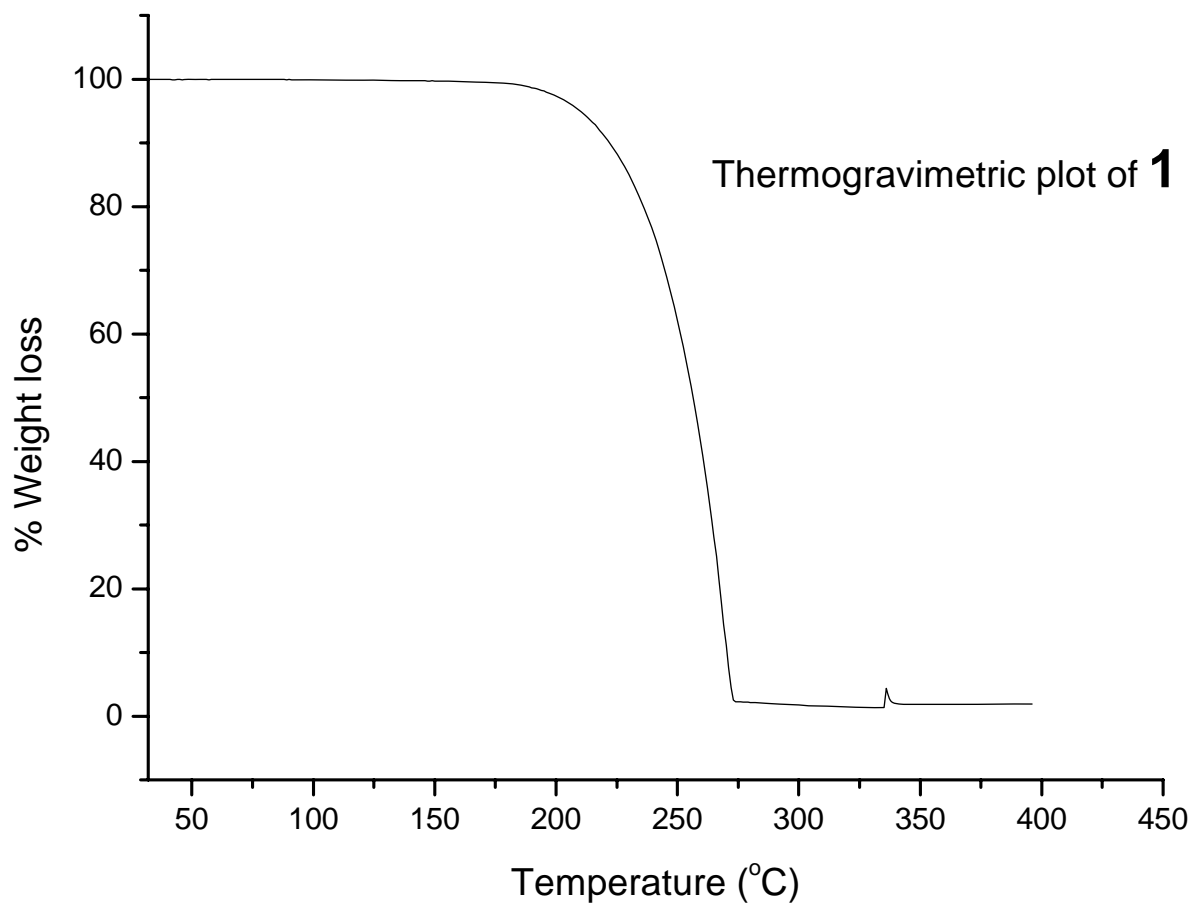

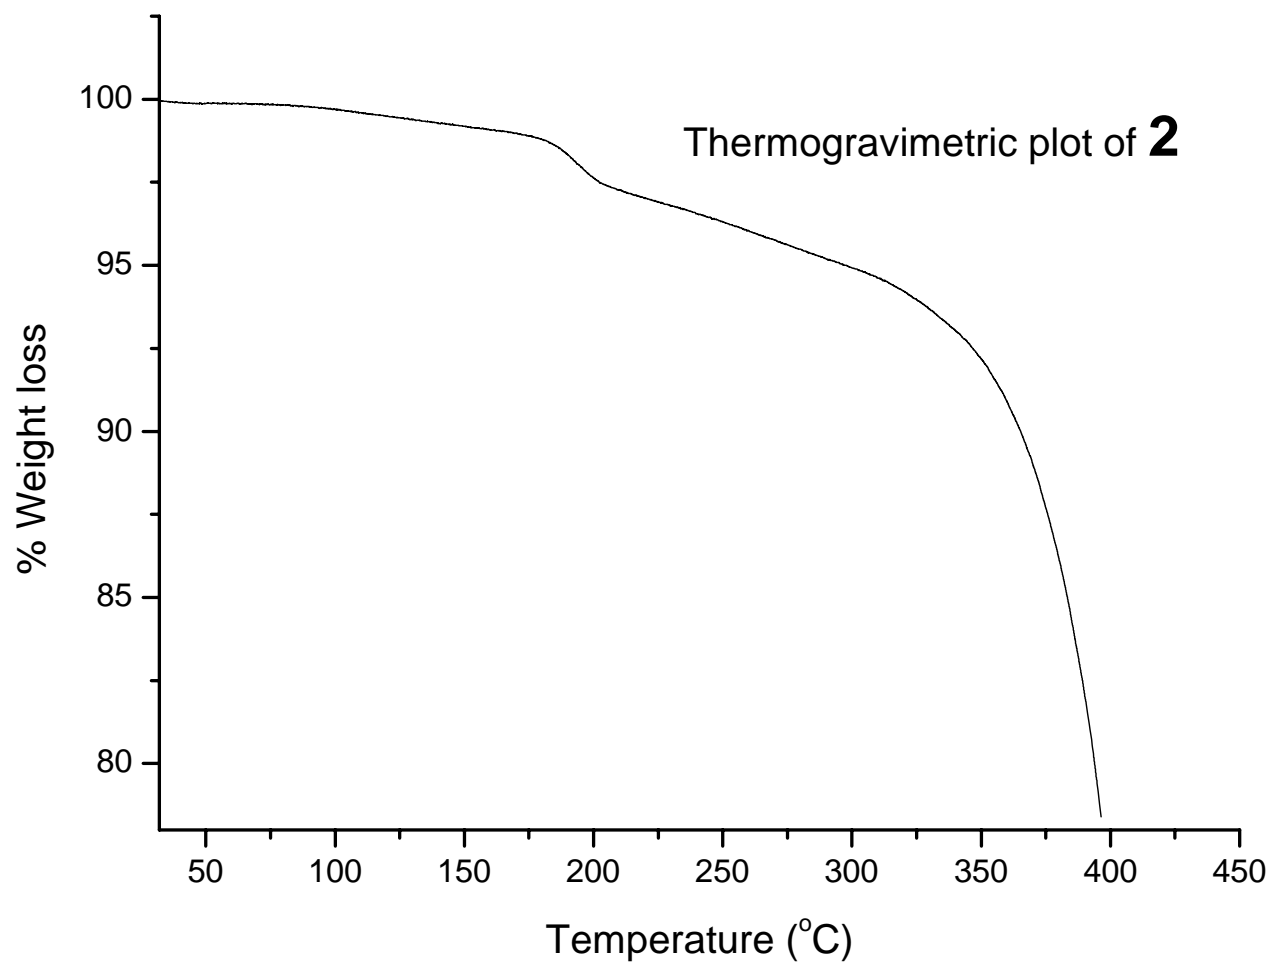

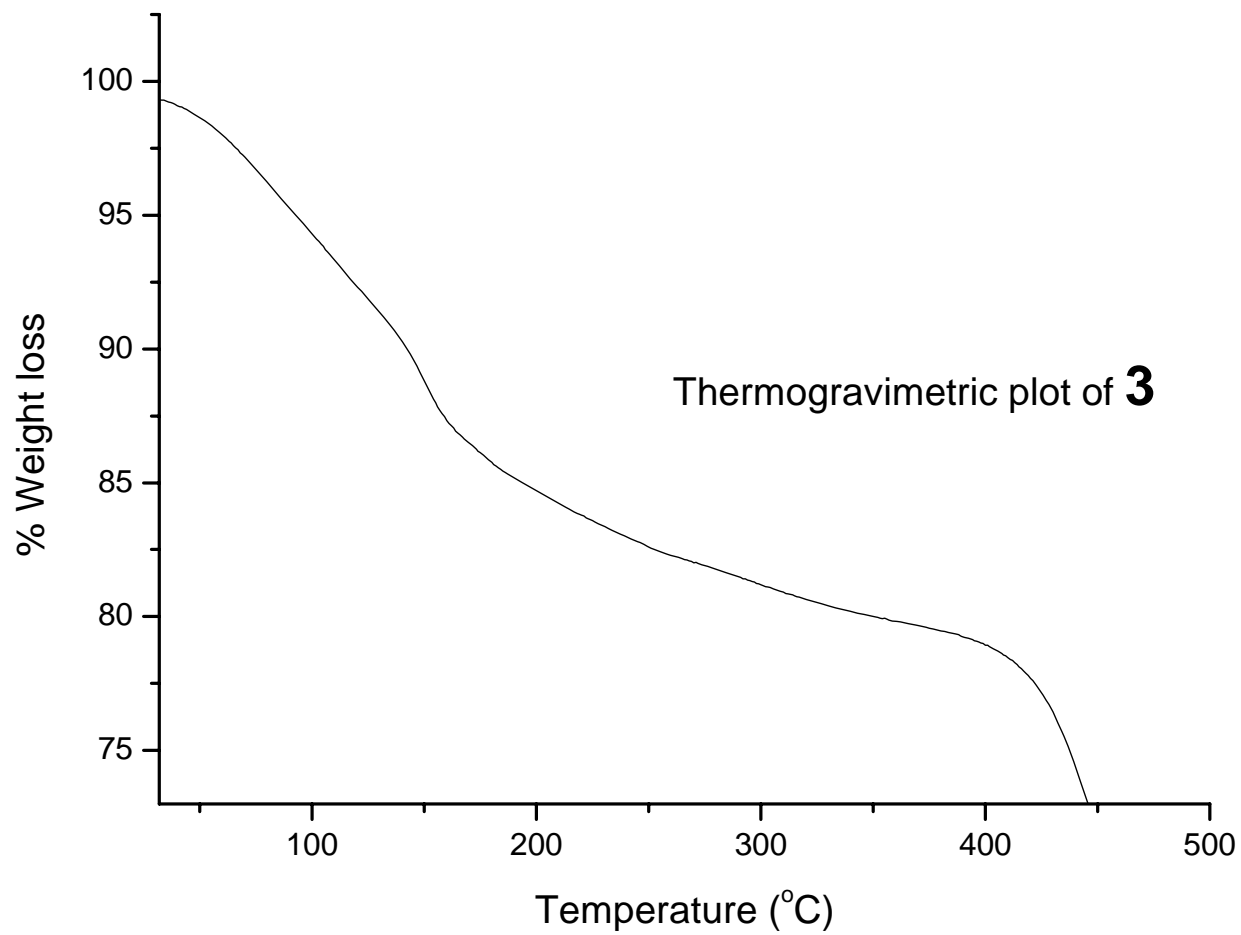

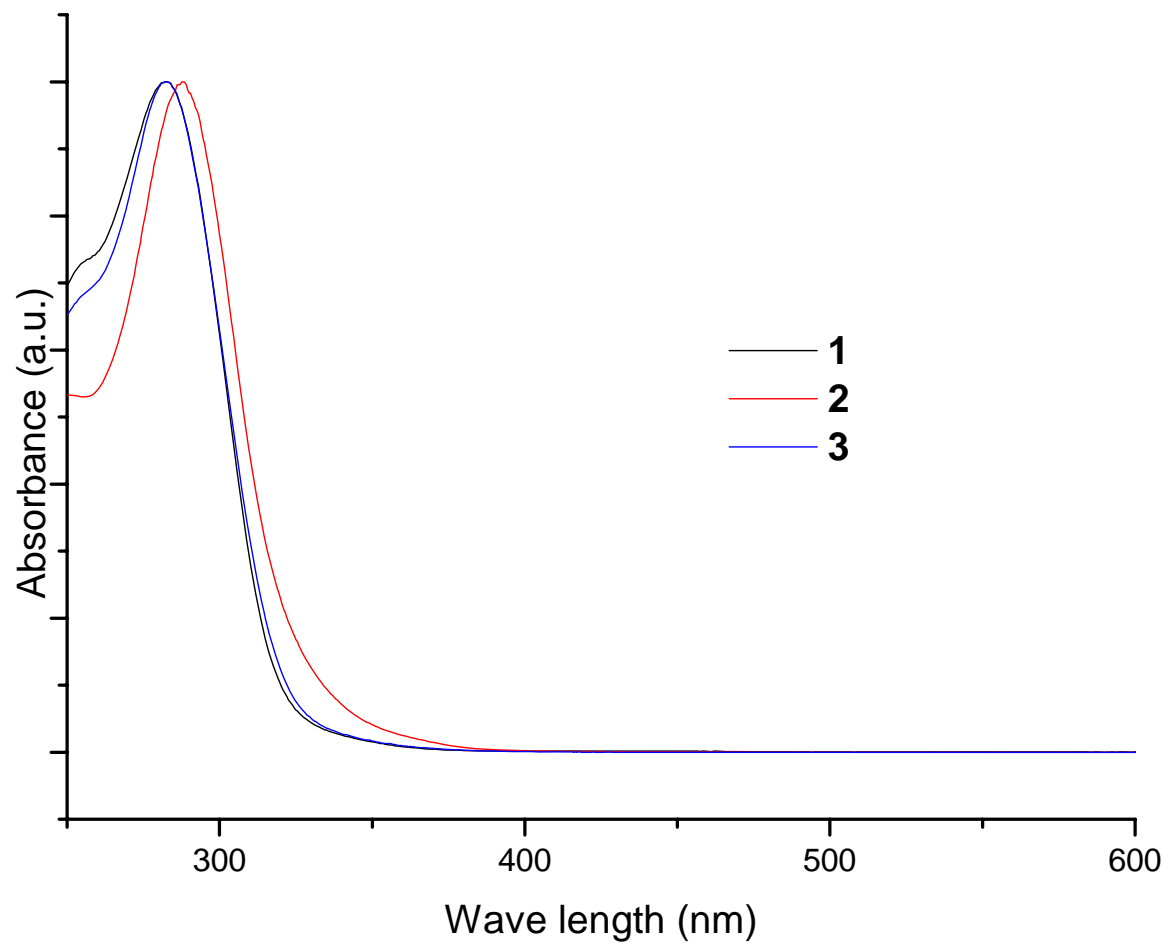

Supplement: b902765c.pdf [file b902765c.pdf]
